# Supplementary material for: A decade of genomic history for healthcare-associated Enterococcus faecium in the United Kingdom and Ireland
Source: PubMed Central journal article supplement (PMC5052055; doi:10.1101/gr.204024.116), 2016-10
Supplement: supp_gr.204024.116_Supplemental_Table_S3.pdf [file supp_gr.204024.116_Supplemental_Table_S3.pdf]

| Isolate ID  | Reads   | Depth of Coverage | N50   |
|-------------|---------|-------------------|-------|
| BSAC_ec1016 | 3929856 | 122.26            | 52733 |
| BSAC_ec1031 | 3834498 | 100.36            | 77598 |
| BSAC_ec1032 | 3957952 | 109.9             | 48065 |
| BSAC_ec1033 | 3516928 | 95.06             | 48296 |
| BSAC_ec1034 | 4196206 | 110.45            | 82860 |
| BSAC_ec1057 | 4146314 | 129.66            | 53172 |
| BSAC_ec1061 | 3525570 | 101.61            | 45514 |
| BSAC_ec1063 | 3771146 | 99.31             | 45610 |
| BSAC_ec1065 | 5172006 | 145.62            | 44308 |
| BSAC_ec1066 | 3949484 | 116.52            | 53082 |
| BSAC_ec1067 | 3728828 | 108.35            | 50944 |
| BSAC_ec1071 | 3765564 | 104.59            | 49300 |
| BSAC_ec1072 | 3462380 | 90.97             | 51982 |
| BSAC_ec1073 | 3840664 | 98.91             | 42370 |
| BSAC_ec1074 | 4303996 | 102.81            | 59079 |
| BSAC_ec1075 | 4019974 | 112.52            | 52803 |
| BSAC_ec1076 | 3682404 | 94.04             | 58205 |
| BSAC_ec1077 | 3836616 | 109.45            | 41611 |
| BSAC_ec1081 | 3762010 | 107.8             | 47885 |
| BSAC_ec1085 | 3991900 | 112.48            | 47892 |
| BSAC_ec1090 | 3466432 | 82.92             | 47698 |
| BSAC_ec1098 | 4268206 | 111.13            | 54896 |
| BSAC_ec1103 | 3933310 | 117.5             | 60582 |
| BSAC_ec1106 | 4050236 | 127.08            | 46338 |
| BSAC_ec1111 | 3811762 | 104.06            | 73628 |
| BSAC_ec1112 | 5024960 | 146.66            | 69745 |
| BSAC_ec1116 | 3902776 | 107.36            | 65517 |
| BSAC_ec1119 | 4180304 | 128.03            | 48237 |
| BSAC_ec1123 | 4068118 | 110.62            | 60199 |
| BSAC_ec1137 | 3765300 | 107.56            | 55712 |
| BSAC_ec1140 | 3925390 | 113.87            | 52728 |
| BSAC_ec1142 | 3745836 | 100.05            | 43698 |
| BSAC_ec1144 | 3876508 | 106.02            | 42690 |
| BSAC_ec1146 | 3745182 | 108.58            | 51681 |
| BSAC_ec1148 | 4412416 | 113.6             | 40842 |
| BSAC_ec1150 | 4488520 | 127.82            | 50292 |
| BSAC_ec1153 | 3930586 | 97.21             | 64383 |
| BSAC_ec1154 | 3819616 | 112.61            | 38814 |
| BSAC_ec1161 | 3459800 | 81.14             | 56434 |
| BSAC_ec1162 | 3959070 | 101.78            | 58198 |
| BSAC_ec1163 | 4617888 | 120.29            | 60261 |
| BSAC_ec1167 | 4389826 | 105.98            | 52715 |
| BSAC_ec1168 | 3471230 | 99.43             | 56579 |
| BSAC_ec1177 | 3982840 | 106.52            | 61443 |
| BSAC_ec1179 | 4012276 | 112.91            | 52736 |

|             |         |        |        |
|-------------|---------|--------|--------|
| BSAC_ec1180 | 4150138 | 110.33 | 53308  |
| BSAC_ec1201 | 4201950 | 108.63 | 39284  |
| BSAC_ec1203 | 4122432 | 125.01 | 47908  |
| BSAC_ec1205 | 3869458 | 107.48 | 43410  |
| BSAC_ec1207 | 4224956 | 102.64 | 39257  |
| BSAC_ec1212 | 4695440 | 138.23 | 39330  |
| BSAC_ec1217 | 3580788 | 103.84 | 48869  |
| BSAC_ec1223 | 3825410 | 104.91 | 51838  |
| BSAC_ec1227 | 4223538 | 117.75 | 55332  |
| BSAC_ec1231 | 4358022 | 109.28 | 40809  |
| BSAC_ec1232 | 3569078 | 104.23 | 164118 |
| BSAC_ec1234 | 3673364 | 108.55 | 53538  |
| BSAC_ec1241 | 3512686 | 94.56  | 46443  |
| BSAC_ec1242 | 3684276 | 94.41  | 66230  |
| BSAC_ec1244 | 3880480 | 107.52 | 45374  |
| BSAC_ec1245 | 3762098 | 102.1  | 48948  |
| BSAC_ec1248 | 4882576 | 144.06 | 46346  |
| BSAC_ec1250 | 4572400 | 126.27 | 51453  |
| BSAC_ec1267 | 3661424 | 101.64 | 60446  |
| BSAC_ec1272 | 3898806 | 112.19 | 43403  |
| BSAC_ec1281 | 3522400 | 96.05  | 57937  |
| BSAC_ec1286 | 3704462 | 113.84 | 49316  |
| BSAC_ec1287 | 3500406 | 102.17 | 59575  |
| BSAC_ec1288 | 3788766 | 101.21 | 66236  |
| BSAC_ec1301 | 3883780 | 113.78 | 56576  |
| BSAC_ec1307 | 3442974 | 89.24  | 50138  |
| BSAC_ec1310 | 4294036 | 108.53 | 46292  |
| BSAC_ec1313 | 3936098 | 106.8  | 36568  |
| BSAC_ec1322 | 4774786 | 128.65 | 64817  |
| BSAC_ec1324 | 4961266 | 125.56 | 55432  |
| BSAC_ec1325 | 3542580 | 98.71  | 46308  |
| BSAC_ec1326 | 3815780 | 101.59 | 44064  |
| BSAC_ec1327 | 4157420 | 101.65 | 55838  |
| BSAC_ec1331 | 5619344 | 162.17 | 50564  |
| BSAC_ec1338 | 3884988 | 115.34 | 43237  |
| BSAC_ec1339 | 4095288 | 117.53 | 60119  |
| BSAC_ec1340 | 3725026 | 109.79 | 40818  |
| BSAC_ec1349 | 4049094 | 126.25 | 48248  |
| BSAC_ec1352 | 3592048 | 103.18 | 54648  |
| BSAC_ec1353 | 3878782 | 102.61 | 53744  |
| BSAC_ec1356 | 4374248 | 118.87 | 57945  |
| BSAC_ec1357 | 4058556 | 108.79 | 59809  |
| BSAC_ec1358 | 4029448 | 106.33 | 59609  |
| BSAC_ec1359 | 3698480 | 97.59  | 59793  |
| BSAC_ec1361 | 4210856 | 113.74 | 47192  |
| BSAC_ec1369 | 3499694 | 97.52  | 40577  |

|             |         |        |        |
|-------------|---------|--------|--------|
| BSAC_ec1382 | 5101894 | 146.22 | 50568  |
| BSAC_ec1388 | 3905380 | 116.76 | 47523  |
| BSAC_ec1392 | 3813740 | 108.72 | 50295  |
| BSAC_ec1394 | 3660242 | 99.26  | 35766  |
| BSAC_ec1395 | 3412916 | 97.25  | 48956  |
| BSAC_ec1399 | 3794972 | 98.7   | 50270  |
| BSAC_ec1406 | 4083558 | 108.81 | 49303  |
| BSAC_ec1416 | 3922928 | 119.08 | 52803  |
| BSAC_ec142  | 3869366 | 109.73 | 46342  |
| BSAC_ec1426 | 3641662 | 101.29 | 51840  |
| BSAC_ec143  | 3582532 | 98.15  | 50494  |
| BSAC_ec1430 | 3606786 | 95.27  | 52805  |
| BSAC_ec1439 | 4023900 | 110.06 | 55140  |
| BSAC_ec144  | 4015408 | 114.22 | 49550  |
| BSAC_ec1451 | 3409320 | 92.35  | 53351  |
| BSAC_ec1452 | 3636770 | 101.01 | 42590  |
| BSAC_ec1454 | 3671072 | 91.26  | 41234  |
| BSAC_ec1455 | 3898688 | 110.55 | 48386  |
| BSAC_ec1483 | 3796280 | 112.36 | 49268  |
| BSAC_ec1484 | 3658694 | 102.24 | 47312  |
| BSAC_ec1485 | 4445178 | 124.25 | 47545  |
| BSAC_ec1489 | 4088204 | 117.6  | 48845  |
| BSAC_ec1491 | 3948412 | 110.37 | 49279  |
| BSAC_ec1496 | 3394188 | 93.93  | 49340  |
| BSAC_ec1497 | 3422856 | 104.15 | 54020  |
| BSAC_ec1498 | 3897482 | 113.45 | 32526  |
| BSAC_ec15   | 4049750 | 113.15 | 77973  |
| BSAC_ec1512 | 3958468 | 104.32 | 44894  |
| BSAC_ec1514 | 3940596 | 114.61 | 38990  |
| BSAC_ec1563 | 4300624 | 132.05 | 49303  |
| BSAC_ec1564 | 3496822 | 93.19  | 249351 |
| BSAC_ec1565 | 3659146 | 95.2   | 48918  |
| BSAC_ec1568 | 3804824 | 87.2   | 54870  |
| BSAC_ec1570 | 4202348 | 124.02 | 48960  |
| BSAC_ec1572 | 4256120 | 118.64 | 43436  |
| BSAC_ec1576 | 4315532 | 98.86  | 49723  |
| BSAC_ec1577 | 3702906 | 96.36  | 44061  |
| BSAC_ec1582 | 3372420 | 99.45  | 46999  |
| BSAC_ec1589 | 4264438 | 114.96 | 53757  |
| BSAC_ec1602 | 4197180 | 119.99 | 50905  |
| BSAC_ec1603 | 3824524 | 109.47 | 49835  |
| BSAC_ec1608 | 4498700 | 136.17 | 45405  |
| BSAC_ec1609 | 5279160 | 139.5  | 53905  |
| BSAC_ec1618 | 4028948 | 112.68 | 170657 |
| BSAC_ec162  | 4486478 | 115.22 | 49349  |
| BSAC_ec1621 | 4146396 | 103.97 | 46901  |

|             |         |        |       |
|-------------|---------|--------|-------|
| BSAC_ec1626 | 3657732 | 109.53 | 51334 |
| BSAC_ec1628 | 3738854 | 109.9  | 48146 |
| BSAC_ec1629 | 4096722 | 111.96 | 38346 |
| BSAC_ec163  | 3741596 | 107.24 | 58272 |
| BSAC_ec1651 | 3772348 | 90.92  | 47883 |
| BSAC_ec1653 | 4084164 | 114.09 | 48299 |
| BSAC_ec1658 | 3984064 | 115.45 | 49454 |
| BSAC_ec1660 | 5606218 | 164.23 | 48846 |
| BSAC_ec1662 | 3417108 | 90.85  | 56036 |
| BSAC_ec1666 | 3863274 | 108.28 | 56938 |
| BSAC_ec1671 | 3918200 | 111.32 | 62324 |
| BSAC_ec1684 | 3887656 | 103.43 | 82229 |
| BSAC_ec1687 | 3865444 | 100.84 | 52447 |
| BSAC_ec1688 | 3727564 | 104.07 | 44761 |
| BSAC_ec1693 | 3788530 | 105.73 | 51562 |
| BSAC_ec1694 | 3479082 | 97.65  | 47309 |
| BSAC_ec1699 | 5303718 | 156.35 | 62138 |
| BSAC_ec1701 | 4117552 | 114.08 | 53371 |
| BSAC_ec1702 | 3807504 | 114.8  | 52466 |
| BSAC_ec1703 | 4996758 | 130.3  | 54602 |
| BSAC_ec1706 | 3649578 | 95.52  | 52322 |
| BSAC_ec1707 | 4642676 | 124.29 | 52344 |
| BSAC_ec1708 | 3775284 | 99.99  | 53887 |
| BSAC_ec1715 | 5267588 | 134.58 | 48710 |
| BSAC_ec1717 | 5768284 | 159.37 | 38694 |
| BSAC_ec1723 | 4426956 | 116.6  | 48957 |
| BSAC_ec1725 | 5435010 | 153.44 | 40871 |
| BSAC_ec1729 | 3673830 | 99.84  | 51425 |
| BSAC_ec1732 | 4134758 | 122.02 | 68874 |
| BSAC_ec1746 | 4084950 | 116.52 | 48947 |
| BSAC_ec1801 | 3653340 | 106.08 | 50400 |
| BSAC_ec1802 | 3717008 | 108.7  | 74866 |
| BSAC_ec1806 | 3837924 | 103.75 | 50334 |
| BSAC_ec1809 | 4063748 | 109.31 | 37848 |
| BSAC_ec1814 | 3834644 | 100.33 | 59346 |
| BSAC_ec1815 | 3882566 | 105.16 | 50266 |
| BSAC_ec1821 | 3570846 | 90.96  | 54112 |
| BSAC_ec1822 | 3675506 | 90.91  | 50611 |
| BSAC_ec1824 | 3807636 | 106.44 | 36218 |
| BSAC_ec1825 | 3903902 | 117    | 49319 |
| BSAC_ec1829 | 3873222 | 100.89 | 49731 |
| BSAC_ec1840 | 3799308 | 104.08 | 54073 |
| BSAC_ec1902 | 3560598 | 92.49  | 49300 |
| BSAC_ec1903 | 3975894 | 100.55 | 49350 |
| BSAC_ec1906 | 3608398 | 96.95  | 46730 |
| BSAC_ec1908 | 3619704 | 97.58  | 49322 |

|             |         |        |       |
|-------------|---------|--------|-------|
| BSAC_ec1910 | 3567856 | 94.49  | 40944 |
| BSAC_ec1935 | 3412236 | 100.5  | 43523 |
| BSAC_ec1937 | 4068076 | 117.12 | 66019 |
| BSAC_ec1949 | 4873178 | 134.59 | 48904 |
| BSAC_ec1951 | 3828710 | 105.08 | 57742 |
| BSAC_ec1952 | 3708806 | 98.88  | 54154 |
| BSAC_ec1971 | 3783750 | 107.43 | 41256 |
| BSAC_ec1972 | 4022366 | 99.83  | 50256 |
| BSAC_ec1973 | 3960414 | 103.87 | 39288 |
| BSAC_ec1984 | 3637926 | 102.51 | 43083 |
| BSAC_ec1993 | 4039158 | 112.03 | 59579 |
| BSAC_ec1997 | 4076550 | 100.8  | 53889 |
| BSAC_ec1998 | 3777366 | 111.25 | 68909 |
| BSAC_ec2000 | 3888070 | 92.91  | 55828 |
| BSAC_ec2004 | 4021742 | 115.01 | 54380 |
| BSAC_ec2005 | 3502598 | 96.74  | 53003 |
| BSAC_ec2006 | 4000636 | 105.12 | 35012 |
| BSAC_ec2008 | 4031322 | 105.72 | 49752 |
| BSAC_ec2009 | 3617622 | 96.93  | 56566 |
| BSAC_ec2032 | 3537170 | 101.38 | 93647 |
| BSAC_ec2034 | 3881668 | 102.18 | 52107 |
| BSAC_ec2036 | 3998384 | 120.44 | 48379 |
| BSAC_ec2037 | 4096098 | 122.88 | 50993 |
| BSAC_ec2041 | 3443636 | 95.42  | 58785 |
| BSAC_ec2043 | 3728882 | 109.01 | 53427 |
| BSAC_ec2044 | 4864650 | 132.95 | 47928 |
| BSAC_ec2048 | 3970040 | 100.25 | 50923 |
| BSAC_ec2050 | 3264154 | 96.2   | 44015 |
| BSAC_ec2054 | 3651406 | 105.35 | 64171 |
| BSAC_ec2061 | 5003324 | 132.9  | 49762 |
| BSAC_ec2062 | 3449008 | 93.84  | 36646 |
| BSAC_ec2065 | 3753708 | 97.78  | 50193 |
| BSAC_ec2070 | 3367126 | 87.94  | 53891 |
| BSAC_ec2071 | 3550334 | 94.8   | 61995 |
| BSAC_ec2074 | 3537976 | 96.08  | 49257 |
| BSAC_ec2075 | 3854654 | 118.39 | 73657 |
| BSAC_ec2076 | 4331366 | 123.41 | 45612 |
| BSAC_ec2077 | 3586374 | 101.04 | 74996 |
| BSAC_ec2078 | 4457792 | 106.17 | 53890 |
| BSAC_ec2080 | 3947096 | 96.41  | 59859 |
| BSAC_ec2084 | 3848206 | 102.81 | 59052 |
| BSAC_ec2085 | 4118432 | 122.99 | 47091 |
| BSAC_ec2087 | 3993476 | 112.99 | 39012 |
| BSAC_ec2090 | 4138036 | 104.34 | 53929 |
| BSAC_ec2101 | 4248254 | 118.56 | 44785 |
| BSAC_ec2114 | 3829186 | 111.92 | 61329 |

|             |         |        |        |
|-------------|---------|--------|--------|
| BSAC_ec2124 | 4165772 | 115.5  | 37074  |
| BSAC_ec2125 | 4386742 | 130.32 | 50137  |
| BSAC_ec2127 | 4761520 | 138.8  | 47932  |
| BSAC_ec2129 | 4334928 | 124.07 | 47887  |
| BSAC_ec2133 | 4296722 | 114.23 | 65022  |
| BSAC_ec2149 | 4413758 | 128.59 | 66356  |
| BSAC_ec2150 | 3835944 | 104.21 | 64288  |
| BSAC_ec2155 | 4499718 | 128.56 | 53214  |
| BSAC_ec2183 | 3850908 | 103.86 | 55983  |
| BSAC_ec2184 | 4519516 | 131.21 | 78082  |
| BSAC_ec2194 | 3806016 | 105.41 | 47306  |
| BSAC_ec2198 | 3869220 | 92.44  | 53029  |
| BSAC_ec2201 | 4095560 | 111.64 | 57948  |
| BSAC_ec2204 | 3999456 | 103.69 | 39388  |
| BSAC_ec2210 | 3919580 | 112.95 | 40981  |
| BSAC_ec222  | 3723764 | 114.93 | 278715 |
| BSAC_ec2220 | 3310796 | 88.44  | 49750  |
| BSAC_ec223  | 3540916 | 94.79  | 41902  |
| BSAC_ec224  | 4064614 | 109.53 | 52873  |
| BSAC_ec225  | 3792404 | 100.14 | 51838  |
| BSAC_ec2259 | 3367172 | 101.3  | 37848  |
| BSAC_ec2268 | 3646960 | 105.77 | 50461  |
| BSAC_ec227  | 4176110 | 126.6  | 53284  |
| BSAC_ec2271 | 3853934 | 99.02  | 61875  |
| BSAC_ec2281 | 3463312 | 91.3   | 58790  |
| BSAC_ec2284 | 3797808 | 115.36 | 45388  |
| BSAC_ec2285 | 4647348 | 113.66 | 53907  |
| BSAC_ec2286 | 3826998 | 99.86  | 50069  |
| BSAC_ec2288 | 3755588 | 100.36 | 50371  |
| BSAC_ec229  | 3771418 | 100.39 | 49551  |
| BSAC_ec2290 | 3956490 | 105.48 | 51729  |
| BSAC_ec2293 | 3865252 | 106.75 | 47159  |
| BSAC_ec2294 | 4145694 | 129.49 | 53782  |
| BSAC_ec2298 | 3904604 | 112.14 | 66968  |
| BSAC_ec2299 | 3852080 | 109.94 | 61149  |
| BSAC_ec2300 | 3977562 | 103.73 | 50085  |
| BSAC_ec2306 | 3684264 | 97.01  | 50037  |
| BSAC_ec2308 | 3926490 | 91.78  | 59870  |
| BSAC_ec2310 | 4143814 | 117.75 | 48149  |
| BSAC_ec2311 | 3846216 | 114.93 | 48910  |
| BSAC_ec2312 | 3979060 | 117.59 | 49758  |
| BSAC_ec2314 | 3557106 | 89.24  | 53905  |
| BSAC_ec2318 | 3753470 | 105.3  | 58520  |
| BSAC_ec2329 | 4022680 | 105.4  | 60832  |
| BSAC_ec2334 | 3209702 | 88.81  | 58274  |
| BSAC_ec2335 | 3294700 | 86.64  | 44052  |

|             |         |        |        |
|-------------|---------|--------|--------|
| BSAC_ec2338 | 4083458 | 122.64 | 38138  |
| BSAC_ec2340 | 3898244 | 107.51 | 60911  |
| BSAC_ec2341 | 3994834 | 119.41 | 50968  |
| BSAC_ec2346 | 3739166 | 102.36 | 51440  |
| BSAC_ec2351 | 4357018 | 127.54 | 48972  |
| BSAC_ec2352 | 4444434 | 114.71 | 53763  |
| BSAC_ec2353 | 3688792 | 103.08 | 52679  |
| BSAC_ec2355 | 3733112 | 94.56  | 48925  |
| BSAC_ec2356 | 3487752 | 101.58 | 51792  |
| BSAC_ec2357 | 2901134 | 74.12  | 56301  |
| BSAC_ec2364 | 4129774 | 109.12 | 56579  |
| BSAC_ec2365 | 3803046 | 102.61 | 49283  |
| BSAC_ec2380 | 3655890 | 96.31  | 55805  |
| BSAC_ec2382 | 3758082 | 96.36  | 40634  |
| BSAC_ec239  | 4391754 | 132.37 | 52803  |
| BSAC_ec2396 | 4206020 | 119.12 | 44430  |
| BSAC_ec2409 | 3824916 | 108.66 | 45590  |
| BSAC_ec241  | 3446182 | 99.73  | 49319  |
| BSAC_ec2411 | 3884458 | 106.21 | 56250  |
| BSAC_ec242  | 3880302 | 114.04 | 74185  |
| BSAC_ec2420 | 4018396 | 111.01 | 52805  |
| BSAC_ec2441 | 4086348 | 116.2  | 53915  |
| BSAC_ec2442 | 3413958 | 99.19  | 59385  |
| BSAC_ec2443 | 3681124 | 102.89 | 59361  |
| BSAC_ec2444 | 3966580 | 118.96 | 47307  |
| BSAC_ec2446 | 5010722 | 146.57 | 64713  |
| BSAC_ec245  | 3473942 | 95.92  | 44051  |
| BSAC_ec246  | 3174208 | 95.06  | 51435  |
| BSAC_ec2482 | 4681528 | 126.6  | 43397  |
| BSAC_ec2484 | 3685522 | 106.39 | 49352  |
| BSAC_ec2485 | 3839534 | 104.99 | 65872  |
| BSAC_ec2486 | 4537300 | 117.69 | 49500  |
| BSAC_ec2496 | 4258382 | 109.57 | 56319  |
| BSAC_ec2498 | 3369688 | 104.42 | 101645 |
| BSAC_ec2499 | 4129348 | 116.42 | 41265  |
| BSAC_ec2500 | 3961466 | 111.36 | 52812  |
| BSAC_ec2502 | 3916732 | 99.51  | 59574  |
| BSAC_ec2503 | 5310464 | 155.31 | 53919  |
| BSAC_ec251  | 4091792 | 109.47 | 52665  |
| BSAC_ec2511 | 4018490 | 127.06 | 49307  |
| BSAC_ec2513 | 4064400 | 109.94 | 53690  |
| BSAC_ec2515 | 3345808 | 83.68  | 37996  |
| BSAC_ec2516 | 3780650 | 104.48 | 66082  |
| BSAC_ec2529 | 3634390 | 99.41  | 48178  |
| BSAC_ec2532 | 4260146 | 127.97 | 68874  |
| BSAC_ec2535 | 4373044 | 121.05 | 63234  |

|             |         |        |       |
|-------------|---------|--------|-------|
| BSAC_ec2559 | 3582042 | 105.79 | 81166 |
| BSAC_ec256  | 3203950 | 95.99  | 55428 |
| BSAC_ec2561 | 3876872 | 111.04 | 53007 |
| BSAC_ec2562 | 3775366 | 101.12 | 41858 |
| BSAC_ec2565 | 3942844 | 113.7  | 57437 |
| BSAC_ec2566 | 3994594 | 112.27 | 52326 |
| BSAC_ec2569 | 4236256 | 115.3  | 62829 |
| BSAC_ec2570 | 3788056 | 90.75  | 45699 |
| BSAC_ec2572 | 3597884 | 105.41 | 50476 |
| BSAC_ec2573 | 3906692 | 105.87 | 59136 |
| BSAC_ec2575 | 4905948 | 137.15 | 52684 |
| BSAC_ec2577 | 3640716 | 102.92 | 56429 |
| BSAC_ec2578 | 3586462 | 91.08  | 55993 |
| BSAC_ec2579 | 4177614 | 107.95 | 55703 |
| BSAC_ec2594 | 4532610 | 136.23 | 57847 |
| BSAC_ec2596 | 4447120 | 127.01 | 43332 |
| BSAC_ec2597 | 4223618 | 100.44 | 39104 |
| BSAC_ec2599 | 4097426 | 117.33 | 44028 |
| BSAC_ec2600 | 3900394 | 88.98  | 49760 |
| BSAC_ec2610 | 4396350 | 112.58 | 56213 |
| BSAC_ec2611 | 3215024 | 89.76  | 49857 |
| BSAC_ec2614 | 4875306 | 132.2  | 48539 |
| BSAC_ec2622 | 3869920 | 112.66 | 56588 |
| BSAC_ec2629 | 3797320 | 92.94  | 43242 |
| BSAC_ec263  | 3955044 | 105.68 | 48873 |
| BSAC_ec2631 | 4592592 | 127.83 | 50294 |
| BSAC_ec2632 | 3200068 | 91.08  | 50296 |
| BSAC_ec2633 | 3784716 | 107.61 | 68900 |
| BSAC_ec2641 | 4049244 | 112.63 | 55112 |
| BSAC_ec2644 | 4478786 | 118.79 | 54140 |
| BSAC_ec2647 | 3126150 | 78.48  | 66255 |
| BSAC_ec265  | 3646394 | 98.9   | 50865 |
| BSAC_ec2660 | 4037820 | 109.73 | 53188 |
| BSAC_ec2668 | 3207204 | 93.16  | 66255 |
| BSAC_ec2685 | 3791452 | 92.86  | 34319 |
| BSAC_ec2690 | 3870170 | 97.74  | 34702 |
| BSAC_ec2700 | 3862808 | 110.98 | 59565 |
| BSAC_ec2701 | 3856702 | 108.98 | 61156 |
| BSAC_ec2708 | 3955452 | 114.22 | 48094 |
| BSAC_ec2727 | 4687788 | 132.7  | 49766 |
| BSAC_ec2729 | 4352844 | 125.83 | 55256 |
| BSAC_ec2731 | 3944678 | 107.4  | 50159 |
| BSAC_ec2732 | 3574768 | 88.54  | 41162 |
| BSAC_ec2733 | 3470816 | 90.03  | 49494 |
| BSAC_ec2742 | 3751602 | 116.2  | 49973 |
| BSAC_ec2744 | 3412444 | 96.65  | 48903 |



|             |         |        |        |
|-------------|---------|--------|--------|
| BSAC_ec2745 | 3785218 | 92.4   | 47908  |
| BSAC_ec2750 | 3830974 | 113.11 | 55927  |
| BSAC_ec2755 | 4548490 | 136.51 | 56574  |
| BSAC_ec2759 | 3426748 | 91.24  | 40599  |
| BSAC_ec2761 | 4140662 | 121.56 | 61235  |
| BSAC_ec2783 | 3668200 | 104.69 | 121955 |
| BSAC_ec2791 | 3778832 | 100.67 | 49080  |
| BSAC_ec289  | 4707996 | 125.62 | 49687  |
| BSAC_ec293  | 3888090 | 115.26 | 61804  |
| BSAC_ec295  | 3786606 | 99.6   | 56408  |
| BSAC_ec296  | 4266916 | 133.72 | 51452  |
| BSAC_ec300  | 4744666 | 118.2  | 49347  |
| BSAC_ec311  | 3392878 | 94.6   | 89363  |
| BSAC_ec312  | 4128506 | 122.65 | 44166  |
| BSAC_ec314  | 4331034 | 127.49 | 45378  |
| BSAC_ec316  | 4027364 | 94.89  | 59575  |
| BSAC_ec318  | 4722926 | 137.2  | 58221  |
| BSAC_ec32   | 3996206 | 123.65 | 68693  |
| BSAC_ec332  | 3961666 | 108.36 | 63489  |
| BSAC_ec335  | 3648590 | 104.99 | 48856  |
| BSAC_ec336  | 3981104 | 99.91  | 45380  |
| BSAC_ec337  | 4189666 | 108.32 | 70518  |
| BSAC_ec34   | 4156728 | 122.7  | 56561  |
| BSAC_ec340  | 3617448 | 99.07  | 46319  |
| BSAC_ec342  | 4005396 | 125.12 | 51434  |
| BSAC_ec356  | 4138766 | 120.82 | 52802  |
| BSAC_ec361  | 4069474 | 122.8  | 53169  |
| BSAC_ec368  | 3880006 | 112.94 | 52368  |
| BSAC_ec383a | 4781308 | 143.31 | 51436  |
| BSAC_ec384  | 4038462 | 109.08 | 47893  |
| BSAC_ec391  | 4711534 | 129.18 | 46751  |
| BSAC_ec411  | 3500228 | 106.93 | 65642  |
| BSAC_ec412  | 3932716 | 107.02 | 287976 |
| BSAC_ec421  | 3839302 | 117.94 | 53379  |
| BSAC_ec426  | 3813056 | 108.88 | 53167  |
| BSAC_ec472  | 3556050 | 96.93  | 58774  |
| BSAC_ec474  | 3896996 | 108.69 | 51855  |
| BSAC_ec476  | 3621682 | 92.01  | 48945  |
| BSAC_ec479  | 4047986 | 114.4  | 49580  |
| BSAC_ec493  | 3426386 | 105.42 | 52541  |
| BSAC_ec494  | 3645408 | 106.05 | 47911  |
| BSAC_ec495  | 3914786 | 110.69 | 52382  |
| BSAC_ec514  | 3864790 | 97.77  | 51821  |
| BSAC_ec516  | 3996832 | 112.56 | 60993  |
| BSAC_ec519  | 4142510 | 112.95 | 53817  |
| BSAC_ec531  | 3590266 | 100.27 | 36849  |

|            |         |        |        |
|------------|---------|--------|--------|
| BSAC_ec533 | 3757214 | 109.35 | 49271  |
| BSAC_ec537 | 3875688 | 110.84 | 48904  |
| BSAC_ec538 | 3800630 | 98.79  | 59719  |
| BSAC_ec547 | 3905424 | 123.63 | 122324 |
| BSAC_ec548 | 4398878 | 133.69 | 49357  |
| BSAC_ec555 | 3811582 | 100.4  | 299148 |
| BSAC_ec562 | 4532154 | 118.8  | 57932  |
| BSAC_ec565 | 3647216 | 91.65  | 34703  |
| BSAC_ec566 | 3955038 | 112.19 | 49540  |
| BSAC_ec570 | 3862678 | 107.89 | 48564  |
| BSAC_ec571 | 3654016 | 93.97  | 94920  |
| BSAC_ec577 | 3335426 | 101.5  | 53421  |
| BSAC_ec578 | 3614882 | 110.2  | 52803  |
| BSAC_ec582 | 4207230 | 125.91 | 58221  |
| BSAC_ec587 | 3936612 | 104.07 | 56260  |
| BSAC_ec603 | 3654768 | 106.75 | 45366  |
| BSAC_ec604 | 3918350 | 114.57 | 44758  |
| BSAC_ec650 | 3535678 | 98.86  | 57987  |
| BSAC_ec66  | 3944938 | 102.05 | 58319  |
| BSAC_ec667 | 4326124 | 132.29 | 59575  |
| BSAC_ec668 | 3941840 | 117.33 | 48664  |
| BSAC_ec67  | 3756022 | 110.66 | 48617  |
| BSAC_ec673 | 3194960 | 97.47  | 54153  |
| BSAC_ec675 | 3862244 | 117.93 | 52733  |
| BSAC_ec676 | 4758514 | 125.68 | 58217  |
| BSAC_ec68  | 4019410 | 115.23 | 53323  |
| BSAC_ec680 | 3610974 | 95.67  | 44943  |
| BSAC_ec698 | 3889624 | 106.76 | 52886  |
| BSAC_ec71  | 3646656 | 100.2  | 52803  |
| BSAC_ec72  | 3514298 | 106.32 | 56773  |
| BSAC_ec725 | 3728812 | 93.91  | 53115  |
| BSAC_ec728 | 3977916 | 115.31 | 45975  |
| BSAC_ec73  | 3713606 | 103.67 | 56575  |
| BSAC_ec730 | 3852794 | 118.19 | 53315  |
| BSAC_ec739 | 4048946 | 124.83 | 265265 |
| BSAC_ec747 | 3423014 | 105.21 | 53520  |
| BSAC_ec748 | 3661786 | 105.97 | 58853  |
| BSAC_ec752 | 3807536 | 104.76 | 55215  |
| BSAC_ec754 | 3939542 | 126.61 | 49321  |
| BSAC_ec781 | 3861716 | 115.37 | 65012  |
| BSAC_ec782 | 3806362 | 109.76 | 64394  |
| BSAC_ec786 | 4164920 | 121.1  | 60580  |
| BSAC_ec787 | 3660736 | 105.56 | 34944  |
| BSAC_ec79  | 3281872 | 90.05  | 63672  |
| BSAC_ec790 | 3566048 | 100.04 | 66236  |
| BSAC_ec80  | 3737638 | 108.93 | 48906  |

|            |         |        |        |
|------------|---------|--------|--------|
| BSAC_ec809 | 4256216 | 108.66 | 48090  |
| BSAC_ec814 | 3920938 | 96.19  | 41187  |
| BSAC_ec816 | 3750422 | 109.36 | 37298  |
| BSAC_ec819 | 4150830 | 117.95 | 47891  |
| BSAC_ec822 | 3779426 | 86.49  | 42696  |
| BSAC_ec823 | 4081156 | 115.75 | 52803  |
| BSAC_ec824 | 3671252 | 99.14  | 52803  |
| BSAC_ec827 | 3683776 | 96.89  | 47873  |
| BSAC_ec828 | 3668858 | 111.34 | 50983  |
| BSAC_ec832 | 3697158 | 102.78 | 48920  |
| BSAC_ec833 | 3996624 | 107.33 | 41106  |
| BSAC_ec835 | 4084944 | 116    | 69185  |
| BSAC_ec837 | 4419752 | 119.41 | 34755  |
| BSAC_ec852 | 5112848 | 153.81 | 42960  |
| BSAC_ec860 | 3540928 | 110.98 | 49290  |
| BSAC_ec871 | 3971370 | 119.81 | 67655  |
| BSAC_ec893 | 3872940 | 121.45 | 97471  |
| BSAC_ec902 | 3324870 | 92.3   | 47891  |
| BSAC_ec903 | 4133200 | 120.29 | 50498  |
| BSAC_ec908 | 3754988 | 112.19 | 45378  |
| BSAC_ec909 | 3557242 | 106.65 | 53520  |
| BSAC_ec911 | 4380312 | 115.61 | 59737  |
| BSAC_ec917 | 4259744 | 118.83 | 52810  |
| BSAC_ec926 | 4626722 | 130.49 | 87950  |
| BSAC_ec929 | 3479380 | 95.27  | 65408  |
| BSAC_ec951 | 3729206 | 104.93 | 52663  |
| BSAC_ec955 | 4050360 | 113.08 | 131945 |
| BSAC_ec956 | 4169232 | 106.91 | 40809  |
| BSAC_ec958 | 3517722 | 92.32  | 43006  |
| BSAC_ec959 | 4235264 | 119.45 | 49305  |
| BSAC_ec960 | 3619152 | 100.06 | 51325  |
| BSAC_ec967 | 3547044 | 110.18 | 69629  |
| BSAC_ec982 | 4068378 | 120.79 | 52460  |
| BSAC_ec986 | 3626292 | 92.28  | 49328  |
| BSAC_ec987 | 3846864 | 108.4  | 41423  |
| BSAC_ec994 | 4907376 | 139.98 | 38923  |
| NCTC 12202 | 3770318 | 107.67 | 70083  |
| NCTC 12204 | 3708514 | 100.16 | 66031  |
| NCTC 12952 | 3902366 | 109.78 | 70522  |
| NCTC 13169 | 3812876 | 110.73 | 101722 |
| NCTC 7171  | 3813730 | 122.6  | 206626 |
| NCTC 7174  | 3767750 | 119.85 | 108107 |
| NCTC 7176  | 3421362 | 110.35 | 191590 |
| NCTC 7378  | 3501594 | 99.01  | 139735 |
| NCTC 7379  | 3916604 | 115.85 | 270692 |
| NCTC 7380  | 3505966 | 104.76 | 167195 |

NCTC 8619

3200348

100.16

84461
