# Supplementary material for: A decade of genomic history for healthcare-associated Enterococcus faecium in the United Kingdom and Ireland
Source: Genome Res. 2016 Oct;26(10):1388–96. doi: 10.1101/gr.204024.116 (PMC5052055; doi:10.1101/gr.204024.116)
Supplement: Supplemental Material [file supp_gr.204024.116_Supp_Table_S2.xlsx]

## Sheet: Sheet1
Table S2: Isolate details
Isolate ID	Accession number	Collection	MLST	Van transposon	Phenotypic vancomycin resistance	Source	Year of isolation	Clade
BSAC_ec1205	ERR374660	BSAC	Missing pstS	VanA	VanA	Blood culture	2005	Clade A (clonal expansion)
BSAC_ec824	ERR374662	BSAC	18	VanA	VanA	Blood culture	2004	Clade A (clonal expansion)
BSAC_ec1359	ERR374663	BSAC	78	VanA	VanA	Blood culture	2006	Clade A (clonal expansion)
BSAC_ec1180	ERR374664	BSAC	17	VanA	VanA	Blood culture	2005	Clade A (clonal expansion)
BSAC_ec1326	ERR374668	BSAC	17	VanA	VanA	Blood culture	2006	Clade A (clonal expansion)
BSAC_ec426	ERR374669	BSAC	16	VSE	VSE	Blood culture	2002	Clade A (clonal expansion)
BSAC_ec809	ERR374670	BSAC	132	VanB	VanB	Blood culture	2004	Clade A (clonal expansion)
BSAC_ec548	ERR374671	BSAC	17	VanA	VanA	Blood culture	2003	Clade A (clonal expansion)
BSAC_ec1074	ERR374673	BSAC	202	VanA	VanA	Blood culture	2005	Clade A (clonal expansion)
BSAC_ec1971	ERR374674	BSAC	18	VanA	VanA	Blood culture	2008	Clade A (clonal expansion)
BSAC_ec2783	ERR374675	BSAC	412	VSE	VSE	Blood culture	2011	Clade A (clonal expansion)
BSAC_ec1338	ERR374676	BSAC	18	VSE	VSE	Blood culture	2006	Clade A (clonal expansion)
BSAC_ec311	ERR374678	BSAC	1035	VSE	VSE	Blood culture	2002	Clade A (basal)
BSAC_ec1694	ERR374679	BSAC	665	VSE	VSE	Blood culture	2007	Clade A (clonal expansion)
BSAC_ec1116	ERR374680	BSAC	202	VSE	VSE	Blood culture	2005	Clade A (clonal expansion)
BSAC_ec239	ERR374681	BSAC	17	VSE	VSE	Blood culture	2001	Clade A (clonal expansion)
BSAC_ec537	ERR374682	BSAC	17	VanA	VanA	Blood culture	2003	Clade A (clonal expansion)
BSAC_ec1608	ERR374683	BSAC	17	VanB*	VSE	Blood culture	2007	Clade A (clonal expansion)
BSAC_ec2329	ERR374685	BSAC	192	VSE	VSE	Blood culture	2010	Clade A (clonal expansion)
BSAC_ec2499	ERR374686	BSAC	412	VSE	VSE	Blood culture	2010	Clade A (clonal expansion)
BSAC_ec227	ERR374688	BSAC	17	VSE	VSE	Blood culture	2001	Clade A (clonal expansion)
BSAC_ec1167	ERR374689	BSAC	202	VanA	VanA	Blood culture	2005	Clade A (clonal expansion)
BSAC_ec1572	ERR374690	BSAC	186	VanA	VanA	Blood culture	2007	Clade A (clonal expansion)
BSAC_ec2641	ERR374692	BSAC	80	VSE	VSE	Blood culture	2011	Clade A (clonal expansion)
BSAC_ec2306	ERR374693	BSAC	280	VanA	VanA	Blood culture	2010	Clade A (clonal expansion)
BSAC_ec2318	ERR374694	BSAC	192	VSE	VSE	Blood culture	2010	Clade A (clonal expansion)
BSAC_ec1430	ERR374696	BSAC	280	VSE	VSE	Blood culture	2006	Clade A (clonal expansion)
BSAC_ec2482	ERR374697	BSAC	17	VanA/VanB	VanA	Blood culture	2010	Clade A (clonal expansion)
BSAC_ec835	ERR374698	BSAC	202	VanA	VanA	Blood culture	2004	Clade A (clonal expansion)
BSAC_ec2647	ERR374701	BSAC	280	VanA	VanA	Blood culture	2011	Clade A (clonal expansion)
BSAC_ec2000	ERR374702	BSAC	203	VanA	VanA	Blood culture	2008	Clade A (clonal expansion)
BSAC_ec1935	ERR374703	BSAC	18	VSE	VSE	Blood culture	2008	Clade A (clonal expansion)
BSAC_ec1212	ERR374705	BSAC	1029	VSE	VSE	Blood culture	2005	Clade A (clonal expansion)
BSAC_ec295	ERR374707	BSAC	64	VanA	VanA	Blood culture	2002	Clade A (clonal expansion)
BSAC_ec837	ERR374713	BSAC	18	VanA	VanA	Blood culture	2004	Clade A (clonal expansion)
BSAC_ec754	ERR374714	BSAC	17	VSE	VSE	Blood culture	2004	Clade A (clonal expansion)
BSAC_ec2498	ERR374726	BSAC	264	VSE	VSE	Blood culture	2010	Clade A (basal)
BSAC_ec2070	ERR374727	BSAC	203	VanA	VanA	Blood culture	2009	Clade A (clonal expansion)
BSAC_ec265	ERR374728	BSAC	16	VSE	VSE	Blood culture	2002	Clade A (clonal expansion)
BSAC_ec908	ERR374729	BSAC	18	VanA	VanA	Blood culture	2004	Clade A (clonal expansion)
BSAC_ec1997	ERR374731	BSAC	203	VanA	VanA	Blood culture	2008	Clade A (clonal expansion)
BSAC_ec1179	ERR374732	BSAC	1042	VanA	VanA	Blood culture	2005	Clade A (clonal expansion)
BSAC_ec162	ERR374733	BSAC	64	VanA	VanA	Blood culture	2001	Clade A (clonal expansion)
BSAC_ec739	ERR374734	BSAC	1037	VSE	VSE	Blood culture	2003	Clade A (basal)
BSAC_ec2314	ERR374735	BSAC	203	VanA	VanA	Blood culture	2010	Clade A (clonal expansion)
BSAC_ec2529	ERR374718	BSAC	412	VanA	VanA	Blood culture	2010	Clade A (clonal expansion)
BSAC_ec1161	ERR374737	BSAC	202	VanA	VanA	Blood culture	2005	Clade A (clonal expansion)
BSAC_ec1568	ERR374738	BSAC	203	VanA	VanA	Blood culture	2007	Clade A (clonal expansion)
BSAC_ec229	ERR374739	BSAC	431	VanA	VanA	Blood culture	2001	Clade A (clonal expansion)
BSAC_ec2077	ERR374740	BSAC	375	VanA	VanA	Blood culture	2009	Clade A (clonal expansion)
BSAC_ec15	ERR374741	BSAC	17	VSE	VSE	Blood culture	2001	Clade A (clonal expansion)
BSAC_ec246	ERR374742	BSAC	17	VSE	VSE	Blood culture	2001	Clade A (clonal expansion)
BSAC_ec1395	ERR374743	BSAC	412	VSE	VSE	Blood culture	2006	Clade A (clonal expansion)
BSAC_ec1369	ERR374744	BSAC	18	VSE	VSE	Blood culture	2006	Clade A (clonal expansion)
BSAC_ec565	ERR374745	BSAC	893	VSE	VSE	Blood culture	2003	Clade A (clonal expansion)
BSAC_ec1687	ERR374719	BSAC	203	VSE	VSE	Blood culture	2007	Clade A (clonal expansion)
BSAC_ec2733	ERR374746	BSAC	203	VanA	VanA	Blood culture	2011	Clade A (clonal expansion)
BSAC_ec336	ERR374749	BSAC	18	VSE	VSE	Blood culture	2002	Clade A (clonal expansion)
BSAC_ec32	ERR374750	BSAC	64	VSE	VSE	Blood culture	2001	Clade A (clonal expansion)
BSAC_ec1361	ERR374751	BSAC	132	VanA/VanB	VanA	Blood culture	2006	Clade A (clonal expansion)
BSAC_ec1998	ERR374752	BSAC	192	VSE	VSE	Blood culture	2008	Clade A (clonal expansion)
BSAC_ec2284	ERR374753	BSAC	17	VanB*	VSE	Blood culture	2010	Clade A (clonal expansion)
BSAC_ec1484	ERR374754	BSAC	665	VSE	VSE	Blood culture	2006	Clade A (clonal expansion)
BSAC_ec782	ERR374755	BSAC	18	VSE	VSE	Blood culture	2004	Clade A (clonal expansion)
BSAC_ec2005	ERR374720	BSAC	1031	VSE	VSE	Blood culture	2009	Clade B
BSAC_ec2579	ERR374756	BSAC	117	VanA	VanA	Blood culture	2011	Clade A (clonal expansion)
BSAC_ec476	ERR374759	BSAC	64	VSE	VSE	Blood culture	2002	Clade A (clonal expansion)
BSAC_ec2288	ERR374760	BSAC	78	VanA	VanA	Blood culture	2010	Clade A (clonal expansion)
BSAC_ec2268	ERR374761	BSAC	203	VSE	VSE	Blood culture	2010	Clade A (clonal expansion)
BSAC_ec725	ERR374762	BSAC	17	VanA	VanA	Blood culture	2003	Clade A (clonal expansion)
BSAC_ec2700	ERR374763	BSAC	64	VSE	VSE	Blood culture	2011	Clade A (clonal expansion)
BSAC_ec2308	ERR374764	BSAC	117	VanA	VanA	Blood culture	2010	Clade A (clonal expansion)
BSAC_ec318	ERR374765	BSAC	202	VanA	VanA	Blood culture	2002	Clade A (clonal expansion)
BSAC_ec1325	ERR374721	BSAC	18	VanA	VanA	Blood culture	2006	Clade A (clonal expansion)
BSAC_ec412	ERR374766	BSAC	696	VSE	VSE	Blood culture	2002	Clade B
BSAC_ec251	ERR374767	BSAC	64	VanA	VanA	Blood culture	2002	Clade A (clonal expansion)
BSAC_ec1340	ERR374769	BSAC	18	VSE	VSE	Blood culture	2006	Clade A (clonal expansion)
BSAC_ec2745	ERR374770	BSAC	17	VanA	VanA	Blood culture	2011	Clade A (clonal expansion)
BSAC_ec1234	ERR374771	BSAC	17	VSE	VSE	Blood culture	2005	Clade A (clonal expansion)
BSAC_ec479	ERR374772	BSAC	431	VanA	VanA	Blood culture	2002	Clade A (clonal expansion)
BSAC_ec1357	ERR374774	BSAC	78	VanA	VanA	Blood culture	2006	Clade A (clonal expansion)
BSAC_ec748	ERR374722	BSAC	16	VanA	VanA	Blood culture	2003	Clade A (clonal expansion)
BSAC_ec1908	ERR374776	BSAC	17	VanA	VanA	Blood culture	2008	Clade A (clonal expansion)
BSAC_ec1702	ERR374777	BSAC	17	VSE	VSE	Blood culture	2007	Clade A (clonal expansion)
BSAC_ec833	ERR374778	BSAC	18	VSE	VSE	Blood culture	2004	Clade A (clonal expansion)
BSAC_ec1392	ERR374779	BSAC	412	VSE	VSE	Blood culture	2006	Clade A (clonal expansion)
BSAC_ec959	ERR374780	BSAC	17	VSE	VSE	Blood culture	2004	Clade A (clonal expansion)
BSAC_ec917	ERR374782	BSAC	18	VSE	VSE	Blood culture	2004	Clade A (clonal expansion)
BSAC_ec293	ERR374783	BSAC	18	VSE	VSE	Blood culture	2002	Clade A (clonal expansion)
BSAC_ec1684	ERR374784	BSAC	202	VanB	VanB	Blood culture	2007	Clade A (clonal expansion)
BSAC_ec555	ERR374785	BSAC	1036	VSE	VSE	Blood culture	2003	Clade B
BSAC_ec2114	ERR374723	BSAC	192	VSE	VSE	Blood culture	2009	Clade A (clonal expansion)
BSAC_ec474	ERR374786	BSAC	431	VanA	VanA	Blood culture	2002	Clade A (clonal expansion)
BSAC_ec1815	ERR374787	BSAC	412	VSE	VSE	Blood culture	2008	Clade A (clonal expansion)
BSAC_ec2446	ERR374789	BSAC	192	VanB	VanB	Blood culture	2010	Clade A (clonal expansion)
BSAC_ec1103	ERR374791	BSAC	17	VSE	VSE	Blood culture	2005	Clade A (clonal expansion)
BSAC_ec73	ERR374792	BSAC	18	VSE	VSE	Blood culture	2001	Clade A (clonal expansion)
BSAC_ec1706	ERR374793	BSAC	203	VanA	VanA	Blood culture	2007	Clade A (clonal expansion)
BSAC_ec2290	ERR374794	BSAC	78	VanA	VanA	Blood culture	2010	Clade A (clonal expansion)
BSAC_ec2742	ERR374724	BSAC	17	VanB*	VSE	Blood culture	2011	Clade A (clonal expansion)
BSAC_ec421	ERR374796	BSAC	17	VSE	VSE	Blood culture	2002	Clade A (clonal expansion)
BSAC_ec2061	ERR374797	BSAC	192	VanA	VanA	Blood culture	2009	Clade A (clonal expansion)
BSAC_ec2596	ERR374798	BSAC	17	VanA/VanB	VanA	Blood culture	2011	Clade A (clonal expansion)
BSAC_ec2310	ERR374799	BSAC	412	VSE	VSE	Blood culture	2010	Clade A (clonal expansion)
BSAC_ec2311	ERR374800	BSAC	18	VSE	VSE	Blood culture	2010	Clade A (clonal expansion)
BSAC_ec332	ERR374803	BSAC	16	VSE	VSE	Blood culture	2002	Clade A (clonal expansion)
BSAC_ec384	ERR374804	BSAC	18	VSE	VSE	Blood culture	2002	Clade A (clonal expansion)
BSAC_ec1399	ERR374805	BSAC	412	VanA	VanA	Blood culture	2006	Clade A (clonal expansion)
BSAC_ec1454	ERR374725	BSAC	412	VSE	VSE	Blood culture	2006	Clade A (clonal expansion)
BSAC_ec2562	ERR374806	BSAC	1032	VSE	VSE	Blood culture	2011	Clade A (clonal expansion)
BSAC_ec2198	ERR374807	BSAC	665	VanA	VanA	Blood culture	2009	Clade A (clonal expansion)
BSAC_ec2074	ERR374808	BSAC	17	VSE	VSE	Blood culture	2009	Clade A (clonal expansion)
BSAC_ec909	ERR374809	BSAC	18	VSE	VSE	Blood culture	2004	Clade A (clonal expansion)
BSAC_ec1307	ERR374810	BSAC	132	VanB	VanB	Blood culture	2006	Clade A (clonal expansion)
BSAC_ec1452	ERR374811	BSAC	18	VSE	VSE	Blood culture	2006	Clade A (clonal expansion)
BSAC_ec577	ERR374812	BSAC	17	VSE	VSE	Blood culture	2003	Clade A (clonal expansion)
BSAC_ec2044	ERR374813	BSAC	203	VSE	VSE	Blood culture	2009	Clade A (clonal expansion)
BSAC_ec1201	ERR374823	BSAC	Missing pstS	VanA	VanA	Blood culture	2005	Clade A (clonal expansion)
BSAC_ec790	ERR374824	BSAC	78	VSE	VSE	Blood culture	2004	Clade A (clonal expansion)
BSAC_ec263	ERR374826	BSAC	18	VSE	VSE	Blood culture	2002	Clade A (clonal expansion)
BSAC_ec587	ERR374827	BSAC	18	VanA	VanA	Blood culture	2003	Clade A (clonal expansion)
BSAC_ec2644	ERR374828	BSAC	203	VSE	VSE	Blood culture	2011	Clade A (clonal expansion)
BSAC_ec1455	ERR374829	BSAC	18	VSE	VSE	Blood culture	2006	Clade A (clonal expansion)
BSAC_ec578	ERR374830	BSAC	17	VSE	VSE	Blood culture	2003	Clade A (clonal expansion)
BSAC_ec1339	ERR374831	BSAC	203	VSE	VSE	Blood culture	2006	Clade A (clonal expansion)
BSAC_ec289	ERR374814	BSAC	132	VanA	VanA	Blood culture	2002	Clade A (clonal expansion)
BSAC_ec1033	ERR374832	BSAC	132	VanB	VanB	Blood culture	2005	Clade A (clonal expansion)
BSAC_ec1394	ERR374833	BSAC	18	VanA	VanA	Blood culture	2006	Clade A (clonal expansion)
BSAC_ec1032	ERR374834	BSAC	132	VanB	VanB	Blood culture	2005	Clade A (clonal expansion)
BSAC_ec2610	ERR374835	BSAC	203	VanA	VanA	Blood culture	2011	Clade A (clonal expansion)
BSAC_ec1973	ERR374836	BSAC	412	VSE	VSE	Blood culture	2008	Clade A (clonal expansion)
BSAC_ec2281	ERR374837	BSAC	78	VanA	VanA	Blood culture	2010	Clade A (clonal expansion)
BSAC_ec860	ERR374838	BSAC	17	VSE	VSE	Blood culture	2004	Clade A (clonal expansion)
BSAC_ec245	ERR374840	BSAC	17	VanA	VanA	Blood culture	2001	Clade A (clonal expansion)
BSAC_ec1949	ERR374815	BSAC	125	VanA	VanA	Blood culture	2008	Clade A (clonal expansion)
BSAC_ec493	ERR374842	BSAC	18	VSE	VSE	Blood culture	2002	Clade A (clonal expansion)
BSAC_ec604	ERR374843	BSAC	18	VSE	VSE	Blood culture	2003	Clade A (clonal expansion)
BSAC_ec495	ERR374844	BSAC	16	VanA	VanA	Blood culture	2002	Clade A (clonal expansion)
BSAC_ec566	ERR374845	BSAC	132	VanB	VanB**	Blood culture	2003	Clade A (clonal expansion)
BSAC_ec570	ERR374847	BSAC	132	VSE	VSE	Blood culture	2003	Clade A (clonal expansion)
BSAC_ec1313	ERR374848	BSAC	18	VanA	VanA	Blood culture	2006	Clade A (clonal expansion)
BSAC_ec1651	ERR374849	BSAC	78	VanA	VanA	Blood culture	2007	Clade A (clonal expansion)
BSAC_ec967	ERR374850	BSAC	17	VSE	VSE	Blood culture	2004	Clade A (clonal expansion)
BSAC_ec1439	ERR374851	BSAC	202	VSE	VSE	Blood culture	2006	Clade A (clonal expansion)
BSAC_ec300	ERR374816	BSAC	64	VanA	VanA	Blood culture	2002	Clade A (clonal expansion)
BSAC_ec1111	ERR374854	BSAC	64	VSE	VSE	Blood culture	2005	Clade A (clonal expansion)
BSAC_ec80	ERR374855	BSAC	18	VSE	VSE	Blood culture	2001	Clade A (clonal expansion)
BSAC_ec1063	ERR374856	BSAC	18	VSE	VSE	Blood culture	2005	Clade A (clonal expansion)
BSAC_ec1072	ERR374857	BSAC	202	VanA	VanA	Blood culture	2005	Clade A (clonal expansion)
BSAC_ec531	ERR374859	BSAC	18	VSE	VSE	Blood culture	2003	Clade A (clonal expansion)
BSAC_ec730	ERR374860	BSAC	17	VSE	VSE	Blood culture	2003	Clade A (clonal expansion)
BSAC_ec142	ERR374861	BSAC	17	VanA	VanA	Blood culture	2001	Clade A (clonal expansion)
BSAC_ec143	ERR374863	BSAC	132	VSE	VSE	Blood culture	2001	Clade A (clonal expansion)
BSAC_ec1910	ERR374864	BSAC	18	VSE	VSE	Blood culture	2008	Clade A (clonal expansion)
BSAC_ec2668	ERR374865	BSAC	78	VSE	VSE	Blood culture	2011	Clade A (clonal expansion)
BSAC_ec1952	ERR374866	BSAC	203	VanA	VanA	Blood culture	2008	Clade A (clonal expansion)
BSAC_ec79	ERR374867	BSAC	132	VanB	VanB**	Blood culture	2001	Clade A (clonal expansion)
BSAC_ec2293	ERR374868	BSAC	18	VanA	VanA	Blood culture	2010	Clade A (clonal expansion)
BSAC_ec241	ERR374870	BSAC	17	VanA	VanA	Blood culture	2001	Clade A (clonal expansion)
BSAC_ec494	ERR374871	BSAC	18	VSE	VSE	Blood culture	2002	Clade A (clonal expansion)
BSAC_ec571	ERR374872	BSAC	1044	VanA	VanA	Blood culture	2003	Clade B
BSAC_ec673	ERR374873	BSAC	17	VSE	VSE	Blood culture	2003	Clade A (clonal expansion)
BSAC_ec1496	ERR374875	BSAC	17	VanA	VanA	Blood culture	2006	Clade A (clonal expansion)
BSAC_ec1162	ERR374876	BSAC	202	VanA	VanA	Blood culture	2005	Clade A (clonal expansion)
BSAC_ec2502	ERR374877	BSAC	117	VanA	VanA	Blood culture	2010	Clade A (clonal expansion)
BSAC_ec1242	ERR374879	BSAC	202	VanA	VanA	Blood culture	2005	Clade A (clonal expansion)
BSAC_ec223	ERR374880	BSAC	18	VanA	VanA	Blood culture	2001	Clade A (clonal expansion)
BSAC_ec256	ERR374881	BSAC	18	VSE	VSE	Blood culture	2002	Clade A (clonal expansion)
BSAC_ec1241	ERR374882	BSAC	18	VanA	VanA	Blood culture	2005	Clade A (clonal expansion)
BSAC_ec2259	ERR374883	BSAC	18	VSE	VSE	Blood culture	2010	Clade A (clonal expansion)
BSAC_ec1822	ERR374884	BSAC	412	VanA	VanA	Blood culture	2008	Clade A (clonal expansion)
BSAC_ec163	ERR374885	BSAC	132	VSE	VSE	Blood culture	2001	Clade A (clonal expansion)
BSAC_ec747	ERR374886	BSAC	18	VSE	VSE	Blood culture	2003	Clade A (clonal expansion)
BSAC_ec1902	ERR374887	BSAC	17	VanA	VanA	Blood culture	2008	Clade A (clonal expansion)
BSAC_ec2220	ERR374889	BSAC	203	VSE	VSE	Blood culture	2009	Clade A (clonal expansion)
BSAC_ec533	ERR374890	BSAC	17	VanA	VanA	Blood culture	2003	Clade A (clonal expansion)
BSAC_ec1322	ERR374820	BSAC	192	VanA	VanA	Blood culture	2006	Clade A (clonal expansion)
BSAC_ec986	ERR374893	BSAC	431	VanA	VanA	Blood culture	2004	Clade A (clonal expansion)
BSAC_ec2744	ERR374894	BSAC	18	VanA	VanA	Blood culture	2011	Clade A (clonal expansion)
BSAC_ec2129	ERR374895	BSAC	18	VanA	VanA	Blood culture	2009	Clade A (clonal expansion)
BSAC_ec71	ERR374897	BSAC	16	VSE	VSE	Blood culture	2001	Clade A (clonal expansion)
BSAC_ec67	ERR374898	BSAC	18	VanA	VanA	Blood culture	2001	Clade A (clonal expansion)
BSAC_ec2732	ERR374899	BSAC	17	VanA	VanA	Blood culture	2011	Clade A (clonal expansion)
BSAC_ec335	ERR374901	BSAC	18	VSE	VSE	Blood culture	2002	Clade A (clonal expansion)
BSAC_ec2633	ERR374821	BSAC	192	VanA	VanA	Blood culture	2011	Clade A (clonal expansion)
BSAC_ec926	ERR374902	BSAC	533	VSE	VSE	Blood culture	2004	Clade A (basal)
BSAC_ec2444	ERR374905	BSAC	665	VSE	VSE	Blood culture	2010	Clade A (clonal expansion)
BSAC_ec668	ERR374907	BSAC	18	VSE	VSE	Blood culture	2003	Clade A (clonal expansion)
BSAC_ec316	ERR374908	BSAC	202	VanA	VanA	Blood culture	2002	Clade A (clonal expansion)
BSAC_ec2034	ERR374909	BSAC	78	VanA	VanA	Blood culture	2009	Clade A (clonal expansion)
BSAC_ec1626	ERR374918	BSAC	80	VSE	VSE	Blood culture	2007	Clade A (clonal expansion)
BSAC_ec2037	ERR374919	BSAC	17	VanB*	VSE	Blood culture	2009	Clade A (clonal expansion)
BSAC_ec2500	ERR374920	BSAC	375	VanA	VanA	Blood culture	2010	Clade A (clonal expansion)
BSAC_ec2346	ERR374921	BSAC	192	VanA	VanA	Blood culture	2010	Clade A (clonal expansion)
BSAC_ec2690	ERR374922	BSAC	546	VanA	VanA	Blood culture	2011	Clade A (clonal expansion)
BSAC_ec1154	ERR374923	BSAC	18	VSE	VSE	Blood culture	2005	Clade A (clonal expansion)
BSAC_ec814	ERR374924	BSAC	18	VSE	VSE	Blood culture	2004	Clade A (clonal expansion)
BSAC_ec2441	ERR374925	BSAC	203	VSE	VSE	Blood culture	2010	Clade A (clonal expansion)
BSAC_ec1629	ERR374926	BSAC	80	VanA	VanA	Blood culture	2007	Clade A (clonal expansion)
BSAC_ec2535	ERR374927	BSAC	192	VanA/VanB	VanA	Blood culture	2011	Clade A (clonal expansion)
BSAC_ec2286	ERR374910	BSAC	78	VanA	VanA	Blood culture	2010	Clade A (clonal expansion)
BSAC_ec2622	ERR374928	BSAC	17	VSE	VSE	Blood culture	2011	Clade A (clonal expansion)
BSAC_ec1203	ERR374929	BSAC	18	VSE	VSE	Blood culture	2005	Clade A (clonal expansion)
BSAC_ec819	ERR374930	BSAC	18	VSE	VSE	Blood culture	2004	Clade A (clonal expansion)
BSAC_ec1563	ERR374931	BSAC	17	VSE	VSE	Blood culture	2007	Clade A (clonal expansion)
BSAC_ec1356	ERR374933	BSAC	78	VanA	VanA	Blood culture	2006	Clade A (clonal expansion)
BSAC_ec2076	ERR374934	BSAC	18	VanA	VanA	Blood culture	2009	Clade A (clonal expansion)
BSAC_ec982	ERR374936	BSAC	17	VSE	VSE	Blood culture	2004	Clade A (clonal expansion)
BSAC_ec667	ERR374937	BSAC	18	VanA	VanA	Blood culture	2003	Clade A (clonal expansion)
BSAC_ec728	ERR374911	BSAC	17	VanA	VanA	Blood culture	2003	Clade A (clonal expansion)
BSAC_ec1514	ERR374938	BSAC	18	VSE	VSE	Blood culture	2007	Clade A (clonal expansion)
BSAC_ec1406	ERR374939	BSAC	18	VSE	VSE	Blood culture	2006	Clade A (clonal expansion)
BSAC_ec2271	ERR374940	BSAC	1039	VanA	VanA	Blood culture	2010	Clade A (clonal expansion)
BSAC_ec2511	ERR374941	BSAC	17	VSE	VSE	Blood culture	2010	Clade A (clonal expansion)
BSAC_ec1146	ERR374942	BSAC	18	VSE	VSE	Blood culture	2005	Clade A (clonal expansion)
BSAC_ec1119	ERR374943	BSAC	18	VSE	VSE	Blood culture	2005	Clade A (clonal expansion)
BSAC_ec2484	ERR374944	BSAC	17	VanB*	VSE	Blood culture	2010	Clade A (clonal expansion)
BSAC_ec1658	ERR374945	BSAC	18	VSE	VSE	Blood culture	2007	Clade A (clonal expansion)
BSAC_ec1073	ERR374947	BSAC	132	VanA	VanA	Blood culture	2005	Clade A (clonal expansion)
BSAC_ec1628	ERR374912	BSAC	18	VSE	VSE	Blood culture	2007	Clade A (clonal expansion)
BSAC_ec1565	ERR374949	BSAC	18	VanA	VanA	Blood culture	2007	Clade A (clonal expansion)
BSAC_ec2075	ERR374950	BSAC	192	VSE	VSE	Blood culture	2009	Clade A (clonal expansion)
BSAC_ec222	ERR374951	BSAC	32	VSE	VSE	Blood culture	2001	Clade A (basal)
BSAC_ec2356	ERR374952	BSAC	203	VSE	VSE	Blood culture	2010	Clade A (clonal expansion)
BSAC_ec1426	ERR374953	BSAC	17	VanA	VanA	Blood culture	2006	Clade A (clonal expansion)
BSAC_ec951	ERR374954	BSAC	202	VanA	VanA	Blood culture	2004	Clade A (clonal expansion)
BSAC_ec2577	ERR374955	BSAC	64	VanA	VanA	Blood culture	2011	Clade A (clonal expansion)
BSAC_ec1618	ERR374956	BSAC	253	VSE	VSE	Blood culture	2007	Clade A (basal)
BSAC_ec472	ERR374957	BSAC	17	VSE	VSE	Blood culture	2002	Clade A (clonal expansion)
BSAC_ec1244	ERR374913	BSAC	18	VSE	VSE	Blood culture	2005	Clade A (clonal expansion)
BSAC_ec2054	ERR374958	BSAC	64	VanA	VanA	Blood culture	2009	Clade A (clonal expansion)
BSAC_ec1840	ERR374959	BSAC	203	VSE	VSE	Blood culture	2008	Clade A (clonal expansion)
BSAC_ec2080	ERR374961	BSAC	203	VSE	VSE	Blood culture	2009	Clade A (clonal expansion)
BSAC_ec1483	ERR374962	BSAC	17	VSE	VSE	Blood culture	2006	Clade A (clonal expansion)
BSAC_ec2150	ERR374963	BSAC	78	VSE	VSE	Blood culture	2009	Clade A (clonal expansion)
BSAC_ec1310	ERR374964	BSAC	117	VanA	VanA	Blood culture	2006	Clade A (clonal expansion)
BSAC_ec340	ERR374965	BSAC	64	VSE	VSE	Blood culture	2002	Clade A (clonal expansion)
BSAC_ec1067	ERR374966	BSAC	80	VSE	VSE	Blood culture	2005	Clade A (clonal expansion)
BSAC_ec1814	ERR374967	BSAC	192	VSE	VSE	Blood culture	2008	Clade A (clonal expansion)
BSAC_ec2008	ERR374914	BSAC	203	VanA	VanA	Blood culture	2009	Clade A (clonal expansion)
BSAC_ec2009	ERR374968	BSAC	78	VanA	VanA	Blood culture	2009	Clade A (clonal expansion)
BSAC_ec1802	ERR374969	BSAC	64	VSE	VSE	Blood culture	2008	Clade A (clonal expansion)
BSAC_ec1140	ERR374970	BSAC	18	VSE	VSE	Blood culture	2005	Clade A (clonal expansion)
BSAC_ec34	ERR374971	BSAC	18	VanA	VanA	Blood culture	2001	Clade A (clonal expansion)
BSAC_ec2133	ERR374972	BSAC	192	VSE	VSE	Blood culture	2009	Clade A (clonal expansion)
BSAC_ec2065	ERR374973	BSAC	203	VanA	VanA	Blood culture	2009	Clade A (clonal expansion)
BSAC_ec1349	ERR374974	BSAC	18	VSE	VSE	Blood culture	2006	Clade A (clonal expansion)
BSAC_ec242	ERR374976	BSAC	64	VSE	VSE	Blood culture	2001	Clade A (clonal expansion)
BSAC_ec1416	ERR374977	BSAC	17	VSE	VSE	Blood culture	2006	Clade A (clonal expansion)
BSAC_ec2396	ERR374915	BSAC	18	VanA	VanA	Blood culture	2010	Clade A (clonal expansion)
BSAC_ec2513	ERR374978	BSAC	280	VanA	VanA	Blood culture	2010	Clade A (clonal expansion)
BSAC_ec2149	ERR374979	BSAC	192	VanA	VanA	Blood culture	2009	Clade A (clonal expansion)
BSAC_ec2340	ERR374982	BSAC	192	VanA	VanA	Blood culture	2010	Clade A (clonal expansion)
BSAC_ec2364	ERR374986	BSAC	412	VSE	VSE	Blood culture	2010	Clade A (clonal expansion)
BSAC_ec538	ERR374987	BSAC	132	VanA	VanA	Blood culture	2003	Clade A (clonal expansion)
BSAC_ec2566	ERR374916	BSAC	203	VanA	VanA	Blood culture	2011	Clade A (clonal expansion)
BSAC_ec1098	ERR374988	BSAC	203	VanA	VanA	Blood culture	2005	Clade A (clonal expansion)
BSAC_ec1142	ERR374989	BSAC	64	VanA	VanA	Blood culture	2005	Clade A (clonal expansion)
BSAC_ec2443	ERR374990	BSAC	203	VanA	VanA	Blood culture	2010	Clade A (clonal expansion)
BSAC_ec1993	ERR374991	BSAC	78	VSE	VSE	Blood culture	2008	Clade A (clonal expansion)
BSAC_ec1301	ERR374992	BSAC	18	VSE	VSE	Blood culture	2006	Clade A (clonal expansion)
BSAC_ec2087	ERR374993	BSAC	18	VanA	VanA	Blood culture	2009	Clade A (clonal expansion)
BSAC_ec781	ERR374994	BSAC	78	VSE	VSE	Blood culture	2004	Clade A (clonal expansion)
BSAC_ec1732	ERR374995	BSAC	192	VSE	VSE	Blood culture	2007	Clade A (clonal expansion)
BSAC_ec871	ERR374917	BSAC	80	VSE	VSE	Blood culture	2004	Clade A (clonal expansion)
BSAC_ec224	ERR374998	BSAC	431	VanA	VanA	Blood culture	2001	Clade A (clonal expansion)
BSAC_ec1451	ERR375001	BSAC	412	VanA	VanA	Blood culture	2006	Clade A (clonal expansion)
BSAC_ec1168	ERR375002	BSAC	64	VSE	VSE	Blood culture	2005	Clade A (clonal expansion)
BSAC_ec1729	ERR375003	BSAC	203	VanA	VanA	Blood culture	2007	Clade A (clonal expansion)
BSAC_ec2570	ERR375005	BSAC	203	VanA	VanA	Blood culture	2011	Clade A (clonal expansion)
BSAC_ec1281	ERR375014	BSAC	78	VanA	VanA	Blood culture	2006	Clade A (clonal expansion)
BSAC_ec1603	ERR375015	BSAC	17	VanA/VanB	VanA	Blood culture	2007	Clade A (clonal expansion)
BSAC_ec1076	ERR375016	BSAC	202	VanA	VanA	Blood culture	2005	Clade A (clonal expansion)
BSAC_ec1071	ERR375017	BSAC	17	VanA	VanA	Blood culture	2005	Clade A (clonal expansion)
BSAC_ec2210	ERR375018	BSAC	1029	VanB	VanB	Blood culture	2009	Clade A (clonal expansion)
BSAC_ec1498	ERR375019	BSAC	1043	VanA	VanA	Blood culture	2006	Clade A (clonal expansion)
BSAC_ec361	ERR375021	BSAC	17	VSE	VSE	Blood culture	2002	Clade A (clonal expansion)
BSAC_ec1984	ERR375022	BSAC	18	VSE	VSE	Blood culture	2008	Clade A (clonal expansion)
BSAC_ec1144	ERR375023	BSAC	18	VanA	VanA	Blood culture	2005	Clade A (clonal expansion)
BSAC_ec1106	ERR375006	BSAC	17	VSE	VSE	Blood culture	2005	Clade A (clonal expansion)
BSAC_ec2062	ERR375024	BSAC	412	VanA	VanA	Blood culture	2009	Clade A (clonal expansion)
BSAC_ec2071	ERR375025	BSAC	117	VanA	VanA	Blood culture	2009	Clade A (clonal expansion)
BSAC_ec2084	ERR375026	BSAC	280	VSE	VSE	Blood culture	2009	Clade A (clonal expansion)
BSAC_ec2204	ERR375027	BSAC	203	VanA	VanA	Blood culture	2009	Clade A (clonal expansion)
BSAC_ec1746	ERR375028	BSAC	18	VanA	VanA	Blood culture	2007	Clade A (clonal expansion)
BSAC_ec1177	ERR375029	BSAC	64	VSE	VSE	Blood culture	2005	Clade A (clonal expansion)
BSAC_ec2036	ERR375030	BSAC	17	VanB*	VSE	Blood culture	2009	Clade A (clonal expansion)
BSAC_ec2341	ERR375031	BSAC	17	VanB*	VSE	Blood culture	2010	Clade A (clonal expansion)
BSAC_ec603	ERR375032	BSAC	18	VSE	VSE	Blood culture	2003	Clade A (clonal expansion)
BSAC_ec1061	ERR375033	BSAC	132	VanB	VanB	Blood culture	2005	Clade A (clonal expansion)
BSAC_ec1703	ERR375007	BSAC	203	VSE	VSE	Blood culture	2007	Clade A (clonal expansion)
BSAC_ec680	ERR375035	BSAC	117	VanA	VanA	Blood culture	2003	Clade A (clonal expansion)
BSAC_ec1577	ERR375036	BSAC	17	VanA	VanA	Blood culture	2007	Clade A (clonal expansion)
BSAC_ec1388	ERR375037	BSAC	80	VSE	VSE	Blood culture	2006	Clade A (clonal expansion)
BSAC_ec2685	ERR375039	BSAC	546	VanA	VanA	Blood culture	2011	Clade A (clonal expansion)
BSAC_ec1806	ERR375040	BSAC	203	VanA	VanA	Blood culture	2008	Clade A (clonal expansion)
BSAC_ec1809	ERR375041	BSAC	18	VSE	VSE	Blood culture	2008	Clade A (clonal expansion)
BSAC_ec2353	ERR375042	BSAC	192	VSE	VSE	Blood culture	2010	Clade A (clonal expansion)
BSAC_ec356	ERR375043	BSAC	16	VSE	VSE	Blood culture	2002	Clade A (clonal expansion)
BSAC_ec2594	ERR375008	BSAC	17	VSE	VSE	Blood culture	2011	Clade A (clonal expansion)
BSAC_ec1207	ERR375044	BSAC	Missing pstS	VanA	VanA	Blood culture	2005	Clade A (clonal expansion)
BSAC_ec1031	ERR375046	BSAC	78	VanA	VanA	Blood culture	2005	Clade A (clonal expansion)
BSAC_ec2032	ERR375047	BSAC	94	VSE	VSE	Blood culture	2009	Clade B
BSAC_ec1951	ERR375048	BSAC	203	VanA	VanA	Blood culture	2008	Clade A (clonal expansion)
BSAC_ec2004	ERR375049	BSAC	1038	VSE	VSE	Blood culture	2009	Clade A (clonal expansion)
BSAC_ec1090	ERR375050	BSAC	202	VanA	VanA	Blood culture	2005	Clade A (clonal expansion)
BSAC_ec2731	ERR375051	BSAC	192	VSE	VSE	Blood culture	2011	Clade A (clonal expansion)
BSAC_ec72	ERR375052	BSAC	18	VanA	VanA	Blood culture	2001	Clade A (clonal expansion)
BSAC_ec1286	ERR375053	BSAC	17	VSE	VSE	Blood culture	2006	Clade A (clonal expansion)
BSAC_ec1248	ERR375009	BSAC	18	VSE	VSE	Blood culture	2005	Clade A (clonal expansion)
BSAC_ec650	ERR375055	BSAC	16	VSE	VSE	Blood culture	2003	Clade A (clonal expansion)
BSAC_ec1034	ERR375056	BSAC	78	VanA	VanA	Blood culture	2005	Clade A (clonal expansion)
BSAC_ec1801	ERR375057	BSAC	18	VSE	VSE	Blood culture	2008	Clade A (clonal expansion)
BSAC_ec1267	ERR375060	BSAC	203	VSE	VSE	Blood culture	2006	Clade A (clonal expansion)
BSAC_ec1077	ERR375062	BSAC	18	VanA	VanA	Blood culture	2005	Clade A (clonal expansion)
BSAC_ec66	ERR375063	BSAC	18	VanA	VanA	Blood culture	2001	Clade A (clonal expansion)
BSAC_ec994	ERR375010	BSAC	18	VSE	VSE**	Blood culture	2004	Clade A (clonal expansion)
BSAC_ec225	ERR375064	BSAC	431	VanA	VanA	Blood culture	2001	Clade A (clonal expansion)
BSAC_ec1288	ERR375066	BSAC	78	VanA	VanA	Blood culture	2006	Clade A (clonal expansion)
BSAC_ec516	ERR375067	BSAC	18	VSE	VSE	Blood culture	2003	Clade A (clonal expansion)
BSAC_ec547	ERR375069	BSAC	413	VSE	VSE	Blood culture	2003	Clade A (clonal expansion)
BSAC_ec1353	ERR375070	BSAC	78	VanA	VanA	Blood culture	2006	Clade A (clonal expansion)
BSAC_ec2124	ERR375071	BSAC	412	VanA	VanA	Blood culture	2009	Clade A (clonal expansion)
BSAC_ec1708	ERR375072	BSAC	203	VanA	VanA	Blood culture	2007	Clade A (clonal expansion)
BSAC_ec411	ERR375073	BSAC	18	VanB	VanB	Blood culture	2002	Clade A (clonal expansion)
BSAC_ec1324	ERR375011	BSAC	431	VanB	VanB	Blood culture	2006	Clade A (clonal expansion)
BSAC_ec2312	ERR375074	BSAC	18	VSE	VSE	Blood culture	2010	Clade A (clonal expansion)
BSAC_ec312	ERR375075	BSAC	18	VSE	VSE	Blood culture	2002	Clade A (clonal expansion)
BSAC_ec2365	ERR375076	BSAC	17	VanA	VanA	Blood culture	2010	Clade A (clonal expansion)
BSAC_ec2750	ERR375077	BSAC	203	VSE	VSE	Blood culture	2011	Clade A (clonal expansion)
BSAC_ec1016	ERR375078	BSAC	18	VSE	VSE	Blood culture	2005	Clade A (clonal expansion)
BSAC_ec2101	ERR375079	BSAC	17	VanA/VanB	VanA	Blood culture	2009	Clade A (clonal expansion)
BSAC_ec1576	ERR375080	BSAC	202	VanA	VanA	Blood culture	2007	Clade A (clonal expansion)
BSAC_ec1358	ERR375081	BSAC	78	VanA	VanA	Blood culture	2006	Clade A (clonal expansion)
BSAC_ec1250	ERR375082	BSAC	17	VanA	VanA	Blood culture	2005	Clade A (clonal expansion)
BSAC_ec1150	ERR375083	BSAC	412	VSE	VSE	Blood culture	2005	Clade A (clonal expansion)
BSAC_ec1112	ERR375012	BSAC	64	VSE	VSE	Blood culture	2005	Clade A (clonal expansion)
BSAC_ec2631	ERR375085	BSAC	412	VSE	VSE	Blood culture	2011	Clade A (clonal expansion)
BSAC_ec1075	ERR375086	BSAC	17	VanA	VanA	Blood culture	2005	Clade A (clonal expansion)
BSAC_ec2125	ERR375087	BSAC	18	VSE	VSE	Blood culture	2009	Clade A (clonal expansion)
BSAC_ec1707	ERR375088	BSAC	203	VanA	VanA	Blood culture	2007	Clade A (clonal expansion)
BSAC_ec1227	ERR375089	BSAC	323	VanA	VanA	Blood culture	2005	Clade A (clonal expansion)
BSAC_ec2352	ERR375090	BSAC	203	VSE	VSE	Blood culture	2010	Clade A (clonal expansion)
BSAC_ec2127	ERR375091	BSAC	18	VSE	VSE	Blood culture	2009	Clade A (clonal expansion)
BSAC_ec2503	ERR375092	BSAC	203	VanA	VanA	Blood culture	2010	Clade A (clonal expansion)
BSAC_ec2569	ERR375093	BSAC	203	VSE	VSE	Blood culture	2011	Clade A (clonal expansion)
BSAC_ec2708	ERR375013	BSAC	80	VSE	VSE	Blood culture	2011	Clade A (clonal expansion)
BSAC_ec852	ERR375094	BSAC	18	VSE	VSE	Blood culture	2004	Clade A (clonal expansion)
BSAC_ec2575	ERR375095	BSAC	64	VanA	VanA	Blood culture	2011	Clade A (clonal expansion)
BSAC_ec2532	ERR375097	BSAC	192	VanB	VanB	Blood culture	2011	Clade A (clonal expansion)
BSAC_ec1148	ERR375099	BSAC	1030	VanA	VanA	Blood culture	2005	Clade A (clonal expansion)
BSAC_ec1065	ERR375100	BSAC	132	VanB	VanB	Blood culture	2005	Clade A (clonal expansion)
BSAC_ec514	ERR375101	BSAC	431	VanA	VanA	Blood culture	2003	Clade A (clonal expansion)
BSAC_ec1245	ERR375111	BSAC	18	VSE	VSE	Blood culture	2005	Clade A (clonal expansion)
BSAC_ec822	ERR375112	BSAC	132	VanA	VanA	Blood culture	2004	Clade A (clonal expansion)
BSAC_ec823	ERR375114	BSAC	18	VanA	VanA	Blood culture	2004	Clade A (clonal expansion)
BSAC_ec955	ERR375115	BSAC	1041	VSE	VSE	Blood culture	2004	Clade B
BSAC_ec903	ERR375116	BSAC	18	VSE	VSE	Blood culture	2004	Clade A (clonal expansion)
BSAC_ec2561	ERR375118	BSAC	64	VanA	VanA	Blood culture	2011	Clade A (clonal expansion)
BSAC_ec2559	ERR375120	BSAC	64	VSE	VSE	Blood culture	2011	Clade A (clonal expansion)
BSAC_ec1217	ERR375121	BSAC	18	VSE	VSE	Blood culture	2005	Clade A (clonal expansion)
BSAC_ec786	ERR375122	BSAC	17	VSE	VSE	Blood culture	2004	Clade A (clonal expansion)
BSAC_ec1352	ERR375124	BSAC	17	VSE	VSE	Blood culture	2006	Clade A (clonal expansion)
BSAC_ec828	ERR375128	BSAC	17	VSE	VSE	Blood culture	2004	Clade A (clonal expansion)
BSAC_ec2572	ERR375129	BSAC	192	VanA	VanA	Blood culture	2011	Clade A (clonal expansion)
BSAC_ec1497	ERR375130	BSAC	18	VSE	VSE	Blood culture	2006	Clade A (clonal expansion)
BSAC_ec2701	ERR375131	BSAC	64	VanA	VanA	Blood culture	2011	Clade A (clonal expansion)
BSAC_ec2565	ERR375133	BSAC	192	VanB	VanB	Blood culture	2011	Clade A (clonal expansion)
BSAC_ec2299	ERR375134	BSAC	64	VSE	VSE	Blood culture	2010	Clade A (clonal expansion)
BSAC_ec2338	ERR375135	BSAC	17	VanB*	VSE	Blood culture	2010	Clade A (clonal expansion)
BSAC_ec2355	ERR375136	BSAC	280	VanA	VanA	Blood culture	2010	Clade A (clonal expansion)
BSAC_ec2516	ERR375137	BSAC	192	VSE	VSE	Blood culture	2010	Clade A (clonal expansion)
BSAC_ec1906	ERR375138	BSAC	117	VSE	VSE	Blood culture	2008	Clade A (clonal expansion)
BSAC_ec1937	ERR375140	BSAC	64	VSE	VSE	Blood culture	2008	Clade A (clonal expansion)
BSAC_ec958	ERR375142	BSAC	Missing pstS	VanA	VanA	Blood culture	2004	Clade A (clonal expansion)
BSAC_ec2335	ERR375143	BSAC	17	VanA/VanB	VanA	Blood culture	2010	Clade A (clonal expansion)
BSAC_ec929	ERR375144	BSAC	440	VanA	VanA	Blood culture	2004	Clade A (clonal expansion)
BSAC_ec2515	ERR375145	BSAC	280	VanA	VanA	Blood culture	2010	Clade A (clonal expansion)
BSAC_ec902	ERR375146	BSAC	18	VanA	VanA	Blood culture	2004	Clade A (clonal expansion)
BSAC_ec2578	ERR375147	BSAC	117	VanA	VanA	Blood culture	2011	Clade A (clonal expansion)
BSAC_ec787	ERR375148	BSAC	170	VSE	VSE	Blood culture	2004	Clade A (basal)
BSAC_ec2599	ERR375149	BSAC	17	VanA/VanB	VanA	Blood culture	2011	Clade A (clonal expansion)
BSAC_ec827	ERR375105	BSAC	18	VanA	VanA	Blood culture	2004	Clade A (clonal expansion)
BSAC_ec893	ERR375150	BSAC	29	VSE	VSE	Blood culture	2004	Clade A (basal)
BSAC_ec1821	ERR375151	BSAC	203	VanA	VanA	Blood culture	2008	Clade A (clonal expansion)
BSAC_ec960	ERR375152	BSAC	17	VanA	VanA	Blood culture	2004	Clade A (clonal expansion)
BSAC_ec816	ERR375153	BSAC	18	VSE	VSE	Blood culture	2004	Clade A (clonal expansion)
BSAC_ec2600	ERR375154	BSAC	17	VanA*	VSE	Blood culture	2011	Clade A (clonal expansion)
BSAC_ec2573	ERR375155	BSAC	203	VSE	VSE	Blood culture	2011	Clade A (clonal expansion)
BSAC_ec1621	ERR375156	BSAC	64	VanA	VanA	Blood culture	2007	Clade A (clonal expansion)
BSAC_ec1123	ERR375157	BSAC	80	VanA	VanA	Blood culture	2005	Clade A (clonal expansion)
BSAC_ec2382	ERR375158	BSAC	280	VanA	VanA	Blood culture	2010	Clade A (clonal expansion)
BSAC_ec698	ERR375106	BSAC	17	VanA	VanA	Blood culture	2003	Clade A (clonal expansion)
BSAC_ec2298	ERR375160	BSAC	192	VanB	VanB	Blood culture	2010	Clade A (clonal expansion)
BSAC_ec2409	ERR375161	BSAC	412	VanA	VanA	Blood culture	2010	Clade A (clonal expansion)
BSAC_ec2485	ERR375162	BSAC	17	VanB*	VSE	Blood culture	2010	Clade A (clonal expansion)
BSAC_ec1272	ERR375163	BSAC	17	VSE	VSE	Blood culture	2006	Clade A (clonal expansion)
BSAC_ec2597	ERR375164	BSAC	17	VanA	VanA	Blood culture	2011	Clade A (clonal expansion)
BSAC_ec1066	ERR375165	BSAC	17	VSE	VSE	Blood culture	2005	Clade A (clonal expansion)
BSAC_ec1491	ERR375167	BSAC	17	VanA	VanA	Blood culture	2006	Clade A (clonal expansion)
BSAC_ec1287	ERR375168	BSAC	17	VSE	VSE	Blood culture	2006	Clade A (clonal expansion)
BSAC_ec1137	ERR375169	BSAC	80	VanB	VanB	Blood culture	2005	Clade A (clonal expansion)
BSAC_ec2300	ERR375107	BSAC	203	VanA	VanA	Blood culture	2010	Clade A (clonal expansion)
BSAC_ec2043	ERR375170	BSAC	17	VSE	VSE	Blood culture	2009	Clade A (clonal expansion)
BSAC_ec956	ERR375172	BSAC	Missing pstS	VanA	VanA	Blood culture	2004	Clade A (clonal expansion)
BSAC_ec1223	ERR375173	BSAC	16	VSE	VSE	Blood culture	2005	Clade A (clonal expansion)
BSAC_ec2041	ERR375174	BSAC	203	VSE	VSE	Blood culture	2009	Clade A (clonal expansion)
BSAC_ec1564	ERR375176	BSAC	108	VSE	VSE	Blood culture	2007	Clade B
BSAC_ec2334	ERR375177	BSAC	375	VanA	VanA	Blood culture	2010	Clade A (clonal expansion)
BSAC_ec1582	ERR375178	BSAC	1040	VSE	VSE	Blood culture	2007	Clade A (clonal expansion)
BSAC_ec2380	ERR375179	BSAC	203	VSE	VSE	Blood culture	2010	Clade A (clonal expansion)
BSAC_ec2442	ERR375182	BSAC	192	VSE	VSE	Blood culture	2010	Clade A (clonal expansion)
BSAC_ec1824	ERR375183	BSAC	18	VanA	VanA	Blood culture	2008	Clade A (clonal expansion)
BSAC_ec832	ERR375187	BSAC	186	VanA	VanA	Blood culture	2004	Clade A (clonal expansion)
BSAC_ec1489	ERR375188	BSAC	18	VSE	VSE	Blood culture	2006	Clade A (clonal expansion)
BSAC_ec1232	ERR375189	BSAC	1033	VSE	VSE	Blood culture	2005	Clade B
BSAC_ec752	ERR375109	BSAC	64	VanA	VanA	Blood culture	2004	Clade A (clonal expansion)
BSAC_ec2611	ERR375192	BSAC	80	VanA	VanA	Blood culture	2011	Clade A (clonal expansion)
BSAC_ec2357	ERR375193	BSAC	117	VanA	VanA	Blood culture	2010	Clade A (clonal expansion)
BSAC_ec2632	ERR375194	BSAC	412	VSE	VSE	Blood culture	2011	Clade A (clonal expansion)
BSAC_ec2050	ERR375195	BSAC	17	VanB*	VSE	Blood culture	2009	Clade A (clonal expansion)
BSAC_ec911	ERR375206	BSAC	18	VSE	VSE	Blood culture	2004	Clade A (clonal expansion)
BSAC_ec391	ERR375207	BSAC	18	VSE	VSE	Blood culture	2002	Clade A (clonal expansion)
BSAC_ec2729	ERR375208	BSAC	80	VSE	VSE	Blood culture	2011	Clade A (clonal expansion)
BSAC_ec2006	ERR375209	BSAC	132	VanA	VanA	Blood culture	2009	Clade A (clonal expansion)
BSAC_ec296	ERR375210	BSAC	17	VSE	VSE	Blood culture	2002	Clade A (clonal expansion)
BSAC_ec582	ERR375213	BSAC	202	VSE	VSE	Blood culture	2003	Clade A (clonal expansion)
BSAC_ec2755	ERR375214	BSAC	80	VSE	VSE	Blood culture	2011	Clade A (clonal expansion)
BSAC_ec2184	ERR375215	BSAC	375	VanA	VanA	Blood culture	2009	Clade A (clonal expansion)
BSAC_ec2761	ERR375216	BSAC	80	VSE	VSE	Blood culture	2011	Clade A (clonal expansion)
BSAC_ec2155	ERR375217	BSAC	64	VSE	VSE	Blood culture	2009	Clade A (clonal expansion)
BSAC_ec383a	ERR375218	BSAC	132	VanB	VanB	Blood culture	2002	Clade A (clonal expansion)
BSAC_ec1327	ERR375219	BSAC	202	VanA	VanA	Blood culture	2006	Clade A (clonal expansion)
BSAC_ec2085	ERR375224	BSAC	18	VSE	VSE	Blood culture	2009	Clade A (clonal expansion)
BSAC_ec2078	ERR375199	BSAC	203	VanA	VanA	Blood culture	2009	Clade A (clonal expansion)
BSAC_ec1570	ERR375226	BSAC	18	VSE	VSE	Blood culture	2007	Clade A (clonal expansion)
BSAC_ec2183	ERR375227	BSAC	202	VanB	VanB**	Blood culture	2009	Clade A (clonal expansion)
BSAC_ec987	ERR375229	BSAC	117	VanA	VanA	Blood culture	2004	Clade A (clonal expansion)
BSAC_ec675	ERR375230	BSAC	18	VSE	VSE	Blood culture	2003	Clade A (clonal expansion)
BSAC_ec2351	ERR375231	BSAC	412	VanA	VanA	Blood culture	2010	Clade A (clonal expansion)
BSAC_ec1512	ERR375232	BSAC	17	VanA	VanA	Blood culture	2007	Clade A (clonal expansion)
BSAC_ec342	ERR375235	BSAC	18	VSE	VSE	Blood culture	2002	Clade A (clonal expansion)
BSAC_ec314	ERR375200	BSAC	18	VSE	VSE	Blood culture	2002	Clade A (clonal expansion)
BSAC_ec2420	ERR375238	BSAC	280	VSE	VSE	Blood culture	2010	Clade A (clonal expansion)
BSAC_ec2629	ERR375240	BSAC	375	VanA	VanA	Blood culture	2011	Clade A (clonal expansion)
BSAC_ec1688	ERR375241	BSAC	132	VanB	VanB	Blood culture	2007	Clade A (clonal expansion)
BSAC_ec2791	ERR375243	BSAC	280	VSE	VSE	Blood culture	2011	Clade A (clonal expansion)
BSAC_ec368	ERR375244	BSAC	18	VanA	VanA	Blood culture	2002	Clade A (clonal expansion)
BSAC_ec2759	ERR375245	BSAC	18	VanA	VanA	Blood culture	2011	Clade A (clonal expansion)
BSAC_ec676	ERR375201	BSAC	202	VanA	VanA	Blood culture	2003	Clade A (clonal expansion)
BSAC_ec1153	ERR375246	BSAC	117	VanA/VanB	VanA	Blood culture	2005	Clade A (clonal expansion)
BSAC_ec2660	ERR375247	BSAC	203	VSE	VSE	Blood culture	2011	Clade A (clonal expansion)
BSAC_ec2194	ERR375248	BSAC	665	VSE	VSE	Blood culture	2009	Clade A (clonal expansion)
BSAC_ec1666	ERR375250	BSAC	202	VSE	VSE	Blood culture	2007	Clade A (clonal expansion)
BSAC_ec1701	ERR375251	BSAC	412	VSE	VSE	Blood culture	2007	Clade A (clonal expansion)
BSAC_ec337	ERR375252	BSAC	186	VSE	VSE	Blood culture	2002	Clade A (clonal expansion)
BSAC_ec1829	ERR375253	BSAC	202	VanA	VanA	Blood culture	2008	Clade A (clonal expansion)
BSAC_ec2727	ERR375254	BSAC	192	VanB	VanB	Blood culture	2011	Clade A (clonal expansion)
BSAC_ec1231	ERR375255	BSAC	16	VanA	VanA	Blood culture	2005	Clade A (clonal expansion)
BSAC_ec1085	ERR375256	BSAC	18	VSE	VSE	Blood culture	2005	Clade A (clonal expansion)
BSAC_ec1653	ERR375257	BSAC	18	VSE	VSE	Blood culture	2007	Clade A (clonal expansion)
BSAC_ec1057	ERR375258	BSAC	18	VSE	VSE	Blood culture	2005	Clade A (clonal expansion)
BSAC_ec2090	ERR375260	BSAC	203	VanA	VanA	Blood culture	2009	Clade A (clonal expansion)
BSAC_ec1671	ERR375264	BSAC	18	VSE	VSE	Blood culture	2007	Clade A (clonal expansion)
BSAC_ec2496	ERR375265	BSAC	117	VanA	VanA	Blood culture	2010	Clade A (clonal expansion)
BSAC_ec1163	ERR375203	BSAC	202	VanA	VanA	Blood culture	2005	Clade A (clonal expansion)
BSAC_ec68	ERR375266	BSAC	202	VanA	VanA	Blood culture	2001	Clade A (clonal expansion)
BSAC_ec1485	ERR375268	BSAC	17	VanA	VanA	Blood culture	2006	Clade A (clonal expansion)
BSAC_ec1723	ERR375270	BSAC	412	VSE	VSE	Blood culture	2007	Clade A (clonal expansion)
BSAC_ec1825	ERR375271	BSAC	17	VSE	VSE	Blood culture	2008	Clade A (clonal expansion)
BSAC_ec2294	ERR375272	BSAC	64	VSE	VSE	Blood culture	2010	Clade A (clonal expansion)
BSAC_ec1602	ERR375273	BSAC	17	VanA/VanB	VanA	Blood culture	2007	Clade A (clonal expansion)
BSAC_ec1693	ERR375274	BSAC	440	VSE	VSE	Blood culture	2007	Clade A (clonal expansion)
BSAC_ec2486	ERR375204	BSAC	18	VanA	VanA	Blood culture	2010	Clade A (clonal expansion)
BSAC_ec144	ERR375276	BSAC	132	VSE	VSE	Blood culture	2001	Clade A (clonal expansion)
BSAC_ec1972	ERR375277	BSAC	412	VSE	VSE	Blood culture	2008	Clade A (clonal expansion)
BSAC_ec1081	ERR375278	BSAC	1029	VSE	VSE	Blood culture	2005	Clade A (clonal expansion)
BSAC_ec562	ERR375279	BSAC	132	VanB	VanB	Blood culture	2003	Clade A (clonal expansion)
BSAC_ec2048	ERR375280	BSAC	280	VanA	VanA	Blood culture	2009	Clade A (clonal expansion)
BSAC_ec2201	ERR375281	BSAC	17	VanA	VanA	Blood culture	2009	Clade A (clonal expansion)
BSAC_ec519	ERR375283	BSAC	132	VanB	VanB	Blood culture	2003	Clade A (clonal expansion)
BSAC_ec1903	ERR375284	BSAC	280	VanA	VanA	Blood culture	2008	Clade A (clonal expansion)
BSAC_ec2285	ERR375285	BSAC	78	VanA	VanA**	Blood culture	2010	Clade A (clonal expansion)
BSAC_ec1589	ERR375286	BSAC	202	VanA	VanA	Blood culture	2007	Clade A (clonal expansion)
BSAC_ec2411	ERR375287	BSAC	203	VSE	VSE	Blood culture	2010	Clade A (clonal expansion)
BSAC_ec1662	ERR375288	BSAC	202	VanA	VanA	Blood culture	2007	Clade A (clonal expansion)
BSAC_ec1331	ERR388687	BSAC	202	VanA	VanA	Blood culture	2006	Clade A (clonal expansion)
BSAC_ec1609	ERR388688	BSAC	78	VanA	VanA	Blood culture	2007	Clade A (clonal expansion)
BSAC_ec1660	ERR388689	BSAC	18	VSE	VSE	Blood culture	2007	Clade A (clonal expansion)
BSAC_ec1699	ERR388690	BSAC	132	VanB	VanB	Blood culture	2007	Clade A (clonal expansion)
BSAC_ec1715	ERR388691	BSAC	80	VSE	VSE	Blood culture	2007	Clade A (clonal expansion)
BSAC_ec1717	ERR388692	BSAC	18	VanA	VanA	Blood culture	2007	Clade A (clonal expansion)
BSAC_ec1725	ERR388693	BSAC	18	VSE	VSE**	Blood culture	2007	Clade A (clonal expansion)
BSAC_ec2614	ERR388694	BSAC	280	VSE	VSE	Blood culture	2011	Clade A (clonal expansion)
BSAC_ec1382	ERR388696	BSAC	412	VanA	VanA	Blood culture	2006	Clade A (clonal expansion)
NCTC 7378	ERR375567	NCTC	361	VSE	VSE	Unknown	≤ 1946	Clade B
NCTC 8619	ERR375576	NCTC	130	VSE	VSE	Unknown	≤ 1950	Clade A (basal)
NCTC 12202	ERR375579	NCTC	18	VanA	VanA	? CVP site	1986	Clade A (clonal expansion)
NCTC 7174	ERR375580	NCTC	1034	VSE	VSE	Unknown	≤ 1946	Clade A (basal)
NCTC 13169	ERR375583	NCTC	71	VSE	VSE	Unknown	c. 1982	Clade A (basal)
NCTC 12204	ERR375585	NCTC	18	VanA	VanA	? Blood	1986	Clade A (clonal expansion)
NCTC 7176	ERR375568	NCTC	160	VSE	VSE	Unknown	≤ 1946	Clade A (basal)
NCTC 7171	ERR375571	NCTC	160	VSE	VSE	Unknown	≤ 1946	Clade A (basal)
NCTC 7380	ERR375572	NCTC	32	VSE	VSE	Unknown	≤ 1946	Clade A (basal)
NCTC 7379	ERR375573	NCTC	22	VSE	VSE	Unknown	≤ 1946	Clade A (basal)
NCTC 12952	ERR375574	NCTC	18	VanB	VanB	Unknown	≤ 1996	Clade A (clonal expansion)
* Missing vanR and vanS or vanRB and vanSB
** Retested on Vitek
